# Supplementary material for: Nonspecific Amyloid Aggregation of Chicken Smooth-Muscle Titin: In Vitro Investigations
Source: MDPI journal article supplement (doi:10.3390/ijms24021056), 2023-01-05
Supplement: s1 [file s1]

Data on the amyloidogenic segments predicted for 6 sequences using the FoldAmyloid software (amino acids are numbered starting from 1 for each sequence)

>sp|A6BM71|**Ig-like\_1** (6-98 A6BM71)

PTFTQPLQSVVALEGSAAATFEAHISGFPVPEVSWYRDGQVLSAATLPGVQISFSDGRAKL  
VIPSVTEANSGRYTIQATNGSGQATSTAELLVT

**Amyloidogenic regions found 2**

59 - 63 (length 5)

89 - 93 (length 5)

>sp|A6BM71|**Ig-like\_10** (1805-1896 A6BM71)

PKIFERIQSQTVAQGTDAHFRVRVVGKPDPECQWFRNGVQIERTDRIYWYWPEDNVCEL  
VIRDVTADDSASIMVKAVNIAGETSSHAFLLVQ

**Amyloidogenic regions found 5**

19 - 24 (length 6)

33 - 37 (length 5)

46 - 51 (length 6)

57 - 63 (length 7)

87 - 92 (length 6)

>sp|A6BM71|**Ig-like\_23** (2966-3056 A6BM71)

PQIIQELQPTTVESGKPARFCAIISGKPQPKVSWYKDDQQLSPGFKCKFLHDAQEYTLILI  
ETFPEDSAVYTCEAKNDYGVATTSSASLSVE

**Amyloidogenic regions found 3**

19 - 23 (length 5)

47 - 51 (length 5)

56 - 63 (length 8)

>sp|A6BM71|**Fibro\_2** (7428-7520 A6BM71)

PGPPQNVEVTDVNRFRGRTLWEAPEYDGGSPITGYVIELNRNASIKWEPTMTTGADELS  
AVLTDVVENEYFFRVRAQNMVGVGKPSHPTRAV

**Amyloidogenic regions found 2**

34 - 39 (length 6)

71 - 75 (length 5)

>sp|A6BM71|**Fibro\_3** (7529-7622 A6BM71)

PSGNINLDHSDQTKTSVQLTWEPPLEDGGSPILGYIIERKEEGTDKWIRCNPKLVPACAFK  
VTGLKAGSSYYYRVSAENAAGVSDPAEAIGPLT

**Amyloidogenic regions found 2**

33 - 38 (length 6)

71 - 75 (length 5)

>sp|A6BM71|**Fibro\_5** (7825 - 7913 A6BM71)

PDPPENVKWRNPTSKGIFLTWEPPKYDGGARIKGYLVEKCQRGTDKWEICGEPVIETKM  
EVTKLKEGEWYAYRVKALNRIGASKPSKPT

**Amyloidogenic regions found 3**

17 - 21 (length 5)

33 - 38 (length 6)

69 - 75 (length 7)

As an example, we calculated the content of amyloidogenic segments in random titin domains (three Ig-like and three FnIII-like). From the data obtained, there were at least two amyloidogenic segments in each of the calculated domains and, e.g., the Ig10 domain had five such segments.

This is yet another proof of the high predisposition of this protein to form amyloid aggregates in the case of domain unfolding.
