# Supplementary material for: Nonspecific Amyloid Aggregation of Chicken Smooth-Muscle Titin: In Vitro Investigations
Source: MDPI journal article supplement (doi:10.3390/ijms24021056), 2023-01-05

## Molecular weight and content of titin isoforms in isolated protein preparations

### Gel 1

Two titin bands, 1102 kDa and 1629 kDa 37.8%/62.2% (lower/upper)

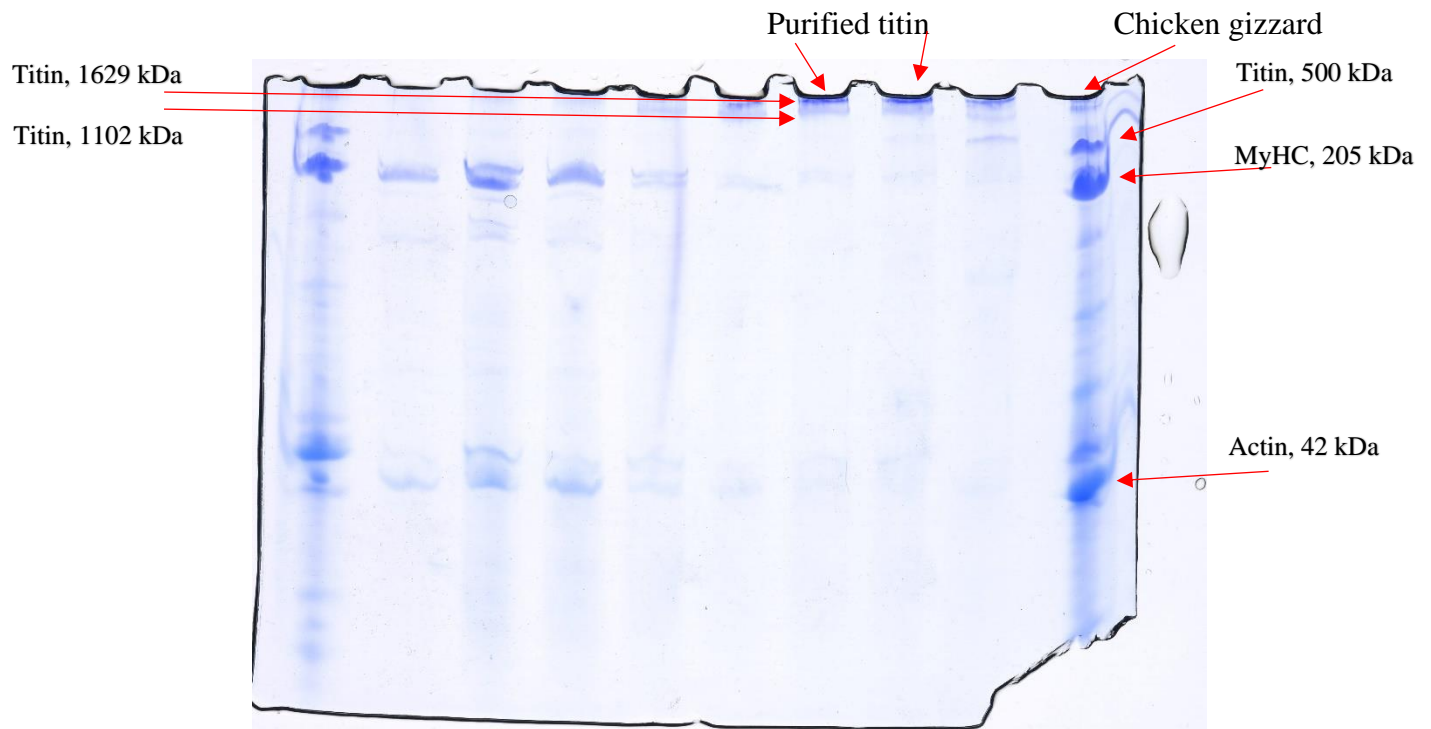

**Gel 2**

Two titin bands, **1061 kDa** and **1322 kDa**    **25% / 75%** (lower / upper)

**1115 kDa** and **1357 kDa**

**1127 kDa** and **1399 kDa**

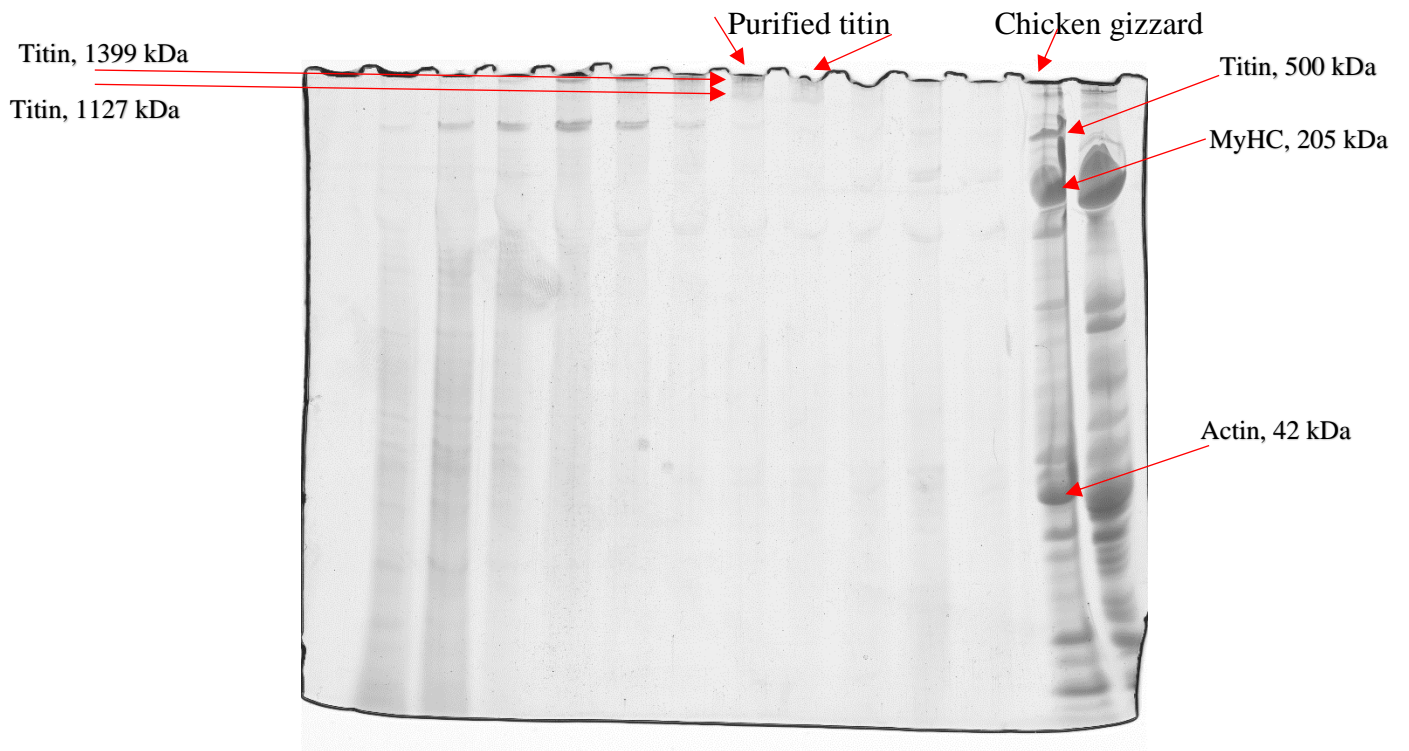

**Gel 3**

Two bands, **1625 kDa** and **1954 kDa**

**31.4% / 68.6%** (lower / upper)

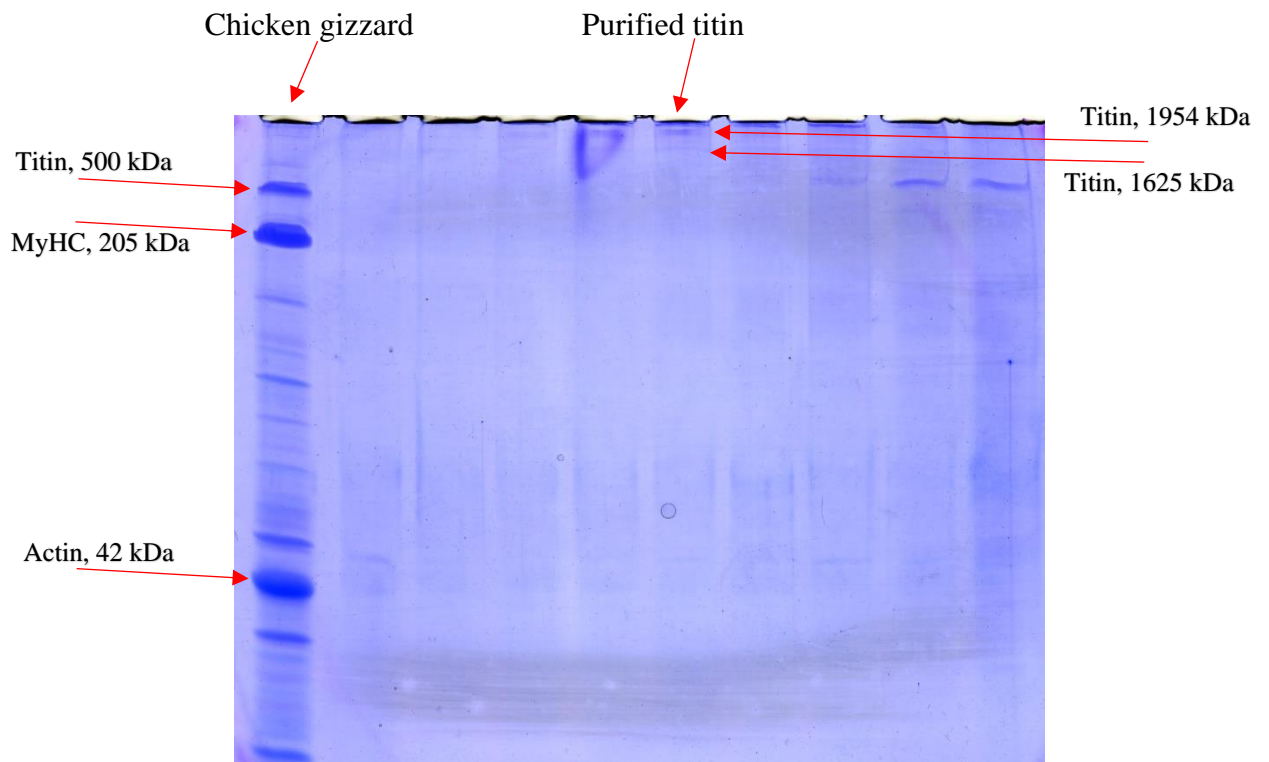

#### Gel 4

Two bands, **1345 kDa** and **1819 kDa**

**22.4% / 77.6%** (lower/upper)

**1354 kDa** and **1819 kDa**

**33.7% / 66.3%** (lower/upper)

**1233 kDa** and **1785 kDa**

**38.4% / 61.6%** (lower/upper)

Purified titin

Chicken gizzard

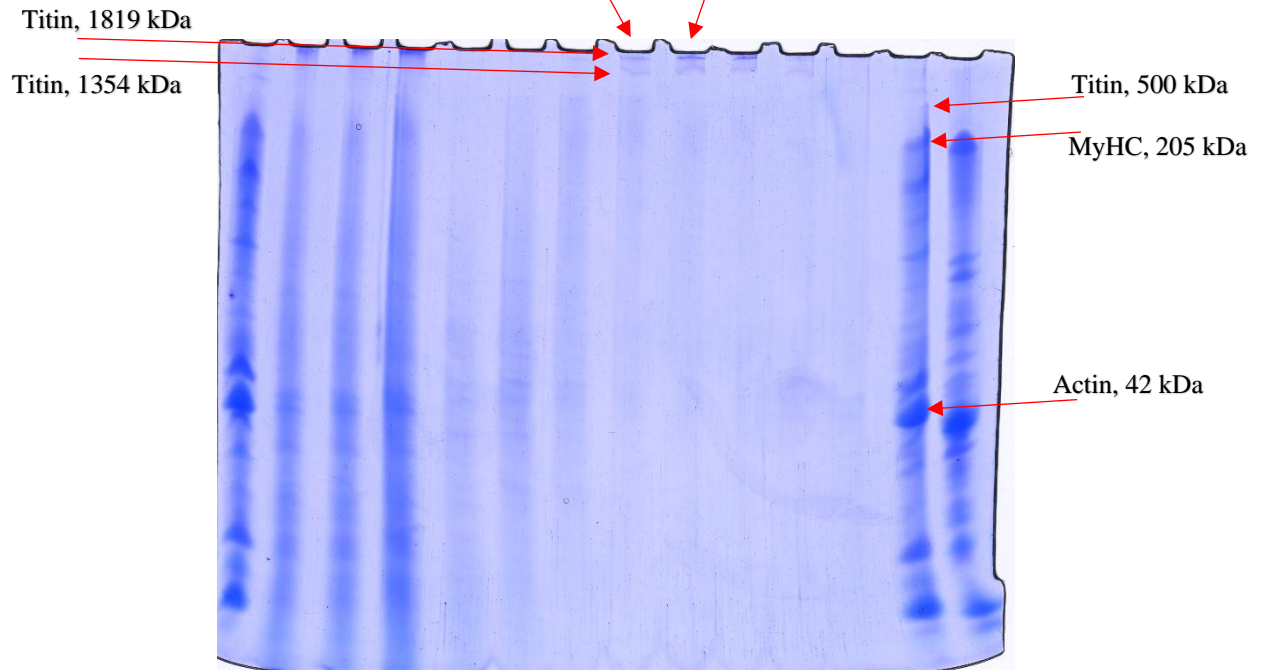

Thus, the preparations of isolated titin contained two isoforms or, possibly, an isoform and a proteolytic fragment with the molecular weights of **1635±245 kDa** (upper band,  $n = 8$ ) and **1245±189 kDa** (lower band,  $n = 8$ ).

The contents of a lower-molecular-weight and higher-molecular-weight titin in the preparations were **31.5% / 68.5%** ( $n = 6$ ).

# Examples of molecular weight calculation

1

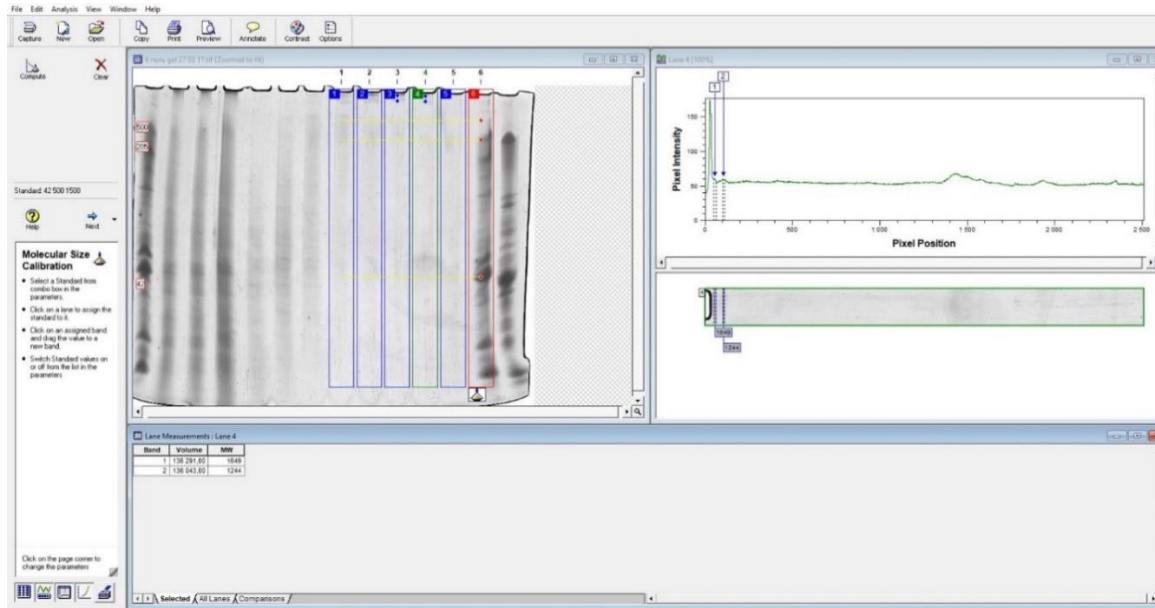

2

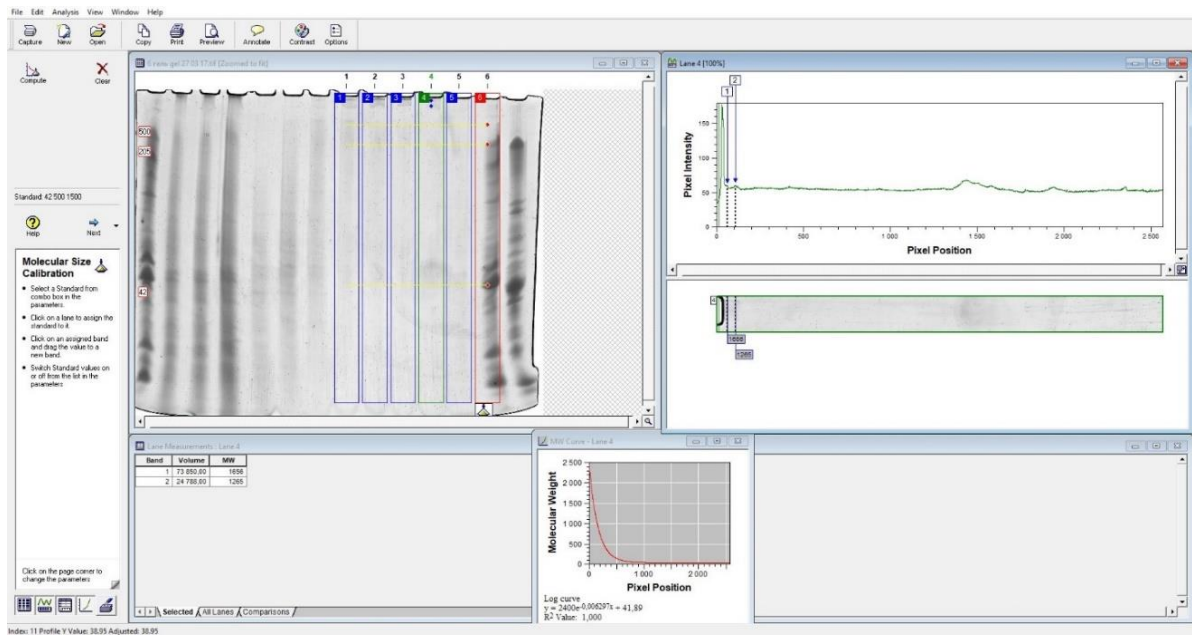

Supplement: s1 [file s1]
