# Supplementary material for: Nonspecific Amyloid Aggregation of Chicken Smooth-Muscle Titin: In Vitro Investigations
Source: Int J Mol Sci. 2023 Jan 5;24(2):1056. doi: 10.3390/ijms24021056 (PMC9861715; doi:10.3390/ijms24021056)
Supplement: Supplementary file 1 [file ijms-24-01056-s001.zip]

Archive with 4 entries (4 files):
- +Supplementary File S1.xlsx
- +Supplementary File S2.pdf
- +Supplementary File S3.pdf
- +Supplementary File S4.pdf
