# Supplementary material for: Nonspecific Amyloid Aggregation of Chicken Smooth-Muscle Titin: In Vitro Investigations
Source: Int J Mol Sci. 2023 Jan 5;24(2):1056. doi: 10.3390/ijms24021056 (PMC9861715; doi:10.3390/ijms24021056)
Supplement: Supplementary file 1 [file ijms-24-01056-s001.zip › +Supplementary File S1.xlsx]

## Sheet: summ_titin_chick_chick
chick	chick	chick	chick	chick	chick
name1	N domens	<L>	name2	N domens	<L>	<id>	Sid	N0	N
PRK12323__0	1	101	Ig-like___1	64	81.4	0.010008	0.023052	52	64
PRK12323__0	1	101	Fibro_____1	6	84.3	0.012478	0.027901	5	6
PRK12323__0	1	101	predic_Ig_0	1	51	0	0	1	1
PRK12323__0	1	101	THB_______0	1	31	0	0	1	1
PRK12323__0	1	101	Titin_Z___0	1	40	0.141844	0	0	1
PRK12323__0	1	101	none_____10	11	104.2	0.023314	0.02367	5	11
Ig-like___1	64	81.4	Ig-like___1	64	81.4	0.19807	0.110166	647	4032
Ig-like___1	64	81.4	Fibro_____1	6	84.3	0.030324	0.044152	223	384
Ig-like___1	64	81.4	predic_Ig_0	1	51	0.015326	0.031665	49	64
Ig-like___1	64	81.4	THB_______0	1	31	0.009672	0.030824	58	64
Ig-like___1	64	81.4	Titin_Z___0	1	40	0.008356	0.028141	58	64
Ig-like___1	64	81.4	none_____10	11	104.2	0.023777	0.059901	526	704
Fibro_____1	6	84.3	Fibro_____1	6	84.3	0.333857	0.066848	0	30
Fibro_____1	6	84.3	predic_Ig_0	1	51	0.042622	0.062602	4	6
Fibro_____1	6	84.3	THB_______0	1	31	0	0	6	6
Fibro_____1	6	84.3	Titin_Z___0	1	40	0.007519	0.016813	5	6
Fibro_____1	6	84.3	none_____10	11	104.2	0.015293	0.024138	43	66
predic_Ig_0	1	51	THB_______0	1	31	0	0	1	1
predic_Ig_0	1	51	Titin_Z___0	1	40	0.131868	0	0	1
predic_Ig_0	1	51	none_____10	11	104.2	0.014675	0.019636	7	11
THB_______0	1	31	Titin_Z___0	1	40	0	0	1	1
THB_______0	1	31	none_____10	11	104.2	0	0	11	11
Titin_Z___0	1	40	none_____10	11	104.2	0.025926	0.038432	7	11
none_____10	11	104.2	none_____10	11	104.2	0.031996	0.04862	59	110

## Sheet: id_titin_chick
name	fs	ls	n	PRK12323__0
				101
PRK12323__0	244	344	101
name	fs	ls	n	Ig-like___1	Ig-like___2	Ig-like___3	Ig-like___4	Ig-like___5	Ig-like___6	Ig-like___7	Ig-like___8	Ig-like___9	Ig-like__10	Ig-like__11	Ig-like__12	Ig-like__13	Ig-like__14	Ig-like__15	Ig-like__16	Ig-like__17	Ig-like__18	Ig-like__19	Ig-like__20	Ig-like__21	Ig-like__22	Ig-like__23	Ig-like__24	Ig-like__25	Ig-like__26	Ig-like__27	Ig-like__28	Ig-like__29	Ig-like__30	Ig-like__31	Ig-like__32	Ig-like__33	Ig-like__34	Ig-like__35	Ig-like__36	Ig-like__37	Ig-like__38	Ig-like__39	Ig-like__40	Ig-like__41	Ig-like__42	Ig-like__43	Ig-like__44	Ig-like__45	Ig-like__46
				93	91	85	90	89	91	92	92	89	92	88	73	72	85	84	83	86	84	84	83	84	79	91	88	86	91	89	91	89	90	90	84	90	88	90	91	90	90	69	85	87	92	68	74	7	65
PRK12323__0	244	344	101	0	10	0	0	4	0	0	0	0	0	0	0	0	0	0	0	0	0	0	0	0	0	5	0	5	6	3	0	4	0	0	0	0	0	3	0	0	0	0	0	0	0	0	0	0	0
name	fs	ls	n	Fibro_____1	Fibro_____2	Fibro_____3	Fibro_____4	Fibro_____5	Fibro_____6
				91	93	94	86	89	53
PRK12323__0	244	344	101	0	0	0	7	0	0
name	fs	ls	n	predic_Ig_0
				51
PRK12323__0	244	344	101	0
name	fs	ls	n	THB_______0
				31
PRK12323__0	244	344	101	0
name	fs	ls	n	Titin_Z___0
				40
PRK12323__0	244	344	101	10
name	fs	ls	n	none_____10	none______0	none______1	none______2	none______3	none______4	none______5	none______6	none______7	none______8	none______9
				107	50	56	254	47	120	59	55	147	53	198
PRK12323__0	244	344	101	6	0	0	5	0	4	4	0	3	0	9
name	fs	ls	n	Ig-like___1	Ig-like___2	Ig-like___3	Ig-like___4	Ig-like___5	Ig-like___6	Ig-like___7	Ig-like___8	Ig-like___9	Ig-like__10	Ig-like__11	Ig-like__12	Ig-like__13	Ig-like__14	Ig-like__15	Ig-like__16	Ig-like__17	Ig-like__18	Ig-like__19	Ig-like__20	Ig-like__21	Ig-like__22	Ig-like__23	Ig-like__24	Ig-like__25	Ig-like__26	Ig-like__27	Ig-like__28	Ig-like__29	Ig-like__30	Ig-like__31	Ig-like__32	Ig-like__33	Ig-like__34	Ig-like__35	Ig-like__36	Ig-like__37	Ig-like__38	Ig-like__39	Ig-like__40	Ig-like__41	Ig-like__42	Ig-like__43	Ig-like__44	Ig-like__45	Ig-like__46
				93	91	85	90	89	91	92	92	89	92	88	73	72	85	84	83	86	84	84	83	84	79	91	88	86	91	89	91	89	90	90	84	90	88	90	91	90	90	69	85	87	92	68	74	7	65
Ig-like___1	6	98	93		37	33	25	29	27	25	29	21	29	29	0	19	20	0	18	12	23	22	0	30	14	38	31	24	25	23	27	26	29	30	20	32	31	35	29	28	28	0	25	33	32	14	14	0	13
Ig-like___2	103	193	91	37		32	19	30	30	23	28	24	30	15	11	27	14	20	8	14	19	23	0	21	17	29	37	23	26	25	0	23	29	20	20	22	20	21	24	23	22	14	23	26	17	16	19	0	14
Ig-like___3	695	779	85	33	32		24	27	23	26	24	24	24	21	17	22	28	19	20	23	14	20	0	22	0	30	27	20	30	23	21	27	27	24	24	28	24	29	26	22	22	19	21	19	19	18	0	0	19
Ig-like___4	827	916	90	25	19	24		23	29	21	28	24	22	16	15	2	16	16	27	11	23	22	0	26	18	24	22	21	29	24	22	31	29	26	24	27	26	30	26	19	32	21	21	27	24	17	15	0	5
Ig-like___5	1037	1125	89	29	30	27	23		26	28	28	26	22	14	0	20	18	0	24	16	23	23	0	25	19	28	29	23	26	24	24	23	29	24	22	23	27	28	18	31	24	16	24	23	18	13	17	0	5
Ig-like___6	1185	1275	91	27	30	23	29	26		0	29	30	31	5	0	0	21	15	17	0	20	25	0	19	12	28	23	20	29	21	21	30	28	26	19	24	27	25	26	21	29	14	15	16	16	15	18	0	0
Ig-like___7	1284	1375	92	25	23	26	21	28	0		22	23	23	20	4	0	25	5	18	18	0	17	15	0	0	24	20	19	23	21	23	21	22	18	24	19	22	20	24	28	22	6	11	0	16	0	10	0	9
Ig-like___8	1431	1522	92	29	28	24	28	28	29	22		20	25	0	15	9	9	18	15	0	7	22	9	26	3	27	20	18	29	21	24	20	29	14	19	23	21	25	16	22	22	12	15	18	26	8	0	0	0
Ig-like___9	1569	1657	89	21	24	24	24	26	30	23	20		23	15	19	16	14	0	0	0	0	20	9	0	0	23	31	22	21	21	23	18	20	24	19	23	15	21	18	22	26	21	0	19	16	0	0	0	15
Ig-like__10	1805	1896	92	29	30	24	22	22	31	23	25	23		6	12	19	10	0	14	23	0	15	19	19	18	25	23	0	22	20	20	24	28	24	16	23	11	0	11	12	27	11	18	0	0	0	14	0	19
Ig-like__11	1902	1989	88	29	15	21	16	14	5	20	0	15	6		24	19	23	28	26	20	23	18	26	32	23	20	19	27	27	19	6	16	26	17	21	20	24	20	20	24	0	18	27	24	33	0	16	0	23
Ig-like__12	1995	2067	73	0	11	17	15	0	0	4	15	19	12	24		21	23	23	24	23	23	20	24	20	23	0	18	20	23	20	10	23	20	13	19	23	16	14	12	19	20	23	19	25	23	8	20	0	20
Ig-like__13	2082	2153	72	19	27	22	2	20	0	0	9	16	19	19	21		22	18	21	21	17	22	24	24	0	11	17	15	19	11	0	21	14	18	13	8	6	18	18	20	20	17	19	17	18	14	0	0	16
Ig-like__14	2173	2257	85	20	14	28	16	18	21	25	9	14	10	23	23	22		21	25	22	20	3	23	27	21	21	27	16	13	12	0	15	20	7	0	24	16	0	16	16	23	16	23	17	18	20	20	6	17
Ig-like__15	2261	2344	84	0	20	19	16	0	15	5	18	0	0	28	23	18	21		26	27	30	27	27	27	22	3	23	17	17	15	18	14	16	11	13	13	22	19	10	14	4	13	21	19	31	17	12	0	20
Ig-like__16	2349	2431	83	18	8	24	27	24	17	18	15	0	14	26	24	21	25	26		31	22	25	25	30	23	5	0	24	19	12	4	20	17	4	22	19	19	20	8	17	17	20	20	20	18	16	23	0	18
Ig-like__17	2435	2520	86	12	14	23	11	16	0	18	0	0	23	20	23	21	22	27	31		26	33	28	28	20	21	18	29	15	11	0	22	12	13	15	9	0	22	15	0	0	25	23	24	18	14	22	0	22
Ig-like__18	2523	2606	84	23	19	14	23	23	20	0	7	0	0	23	23	17	20	30	22	26		31	23	25	18	20	22	16	15	22	24	31	19	27	15	15	18	25	14	16	0	17	20	23	24	8	17	0	19
Ig-like__19	2610	2693	84	22	23	20	22	23	25	17	22	20	15	18	20	22	3	27	25	33	31		33	30	27	25	21	24	23	15	0	18	0	12	22	15	12	21	0	18	22	21	23	26	27	13	19	0	18
Ig-like__20	2698	2780	83	0	0	0	0	0	0	15	9	9	19	26	24	24	23	27	25	28	23	33		27	27	15	21	27	18	16	3	23	0	21	24	15	0	20	17	23	0	17	18	25	19	0	21	0	17
Ig-like__21	2786	2869	84	30	21	22	26	25	19	0	26	0	19	32	20	24	27	27	30	28	25	30	27		35	25	21	28	20	21	21	20	27	12	22	21	23	28	17	20	26	25	25	26	35	18	21	0	17
Ig-like__22	2882	2960	79	14	17	0	18	19	12	0	3	0	18	23	23	0	21	22	23	20	18	27	27	35		16	26	21	18	0	0	16	17	12	0	18	15	22	11	16	8	15	16	30	14	17	10	0	14
Ig-like__23	2966	3056	91	38	29	30	24	28	28	24	27	23	25	20	0	11	21	3	5	21	20	25	15	25	16		29	23	30	20	23	27	26	27	20	30	23	25	17	23	29	20	21	22	24	14	0	0	15
Ig-like__24	3072	3159	88	31	37	27	22	29	23	20	20	31	23	19	18	17	27	23	0	18	22	21	21	21	26	29		30	25	20	0	26	25	21	22	27	23	27	28	24	21	16	22	27	23	16	18	0	20
Ig-like__25	3187	3272	86	24	23	20	21	23	20	19	18	22	0	27	20	15	16	17	24	29	16	24	27	28	21	23	30		29	30	22	28	29	25	20	28	21	28	25	28	25	21	28	27	21	0	23	0	0
Ig-like__26	3276	3366	91	25	26	30	29	26	29	23	29	21	22	27	23	19	13	17	19	15	15	23	18	20	18	30	25	29		30	29	31	35	33	28	33	23	27	27	29	26	19	17	30	15	0	21	0	11
Ig-like__27	3370	3458	89	23	25	23	24	24	21	21	21	21	20	19	20	11	12	15	12	11	22	15	16	21	0	20	20	30	30		29	32	31	23	27	30	26	33	32	33	17	21	21	21	17	17	14	0	15
Ig-like__28	3463	3553	91	27	0	21	22	24	21	23	24	23	20	6	10	0	0	18	4	0	24	0	3	21	0	23	0	22	29	29		29	30	30	32	28	30	35	31	32	20	6	20	0	26	21	13	0	16
Ig-like__29	3558	3646	89	26	23	27	31	23	30	21	20	18	24	16	23	21	15	14	20	22	31	18	23	20	16	27	26	28	31	32	29		26	33	28	33	24	34	29	25	23	21	19	22	23	17	24	0	10
Ig-like__30	3653	3742	90	29	29	27	29	29	28	22	29	20	28	26	20	14	20	16	17	12	19	0	0	27	17	26	25	29	35	31	30	26		32	26	24	32	35	33	29	20	18	23	18	22	14	16	0	0
Ig-like__31	3746	3835	90	30	20	24	26	24	26	18	14	24	24	17	13	18	7	11	4	13	27	12	21	12	12	27	21	25	33	23	30	33	32		25	27	27	31	29	27	29	16	14	9	22	4	20	0	10
Ig-like__32	3840	3923	84	20	20	24	24	22	19	24	19	19	16	21	19	13	0	13	22	15	15	22	24	22	0	20	22	20	28	27	32	28	26	25		22	23	24	25	27	17	22	20	19	20	21	0	0	19
Ig-like__33	3932	4021	90	32	22	28	27	23	24	19	23	23	23	20	23	8	24	13	19	9	15	15	15	21	18	30	27	28	33	30	28	33	24	27	22		29	30	29	33	26	18	16	24	22	14	21	0	22
Ig-like__34	4028	4115	88	31	20	24	26	27	27	22	21	15	11	24	16	6	16	22	19	0	18	12	0	23	15	23	23	21	23	26	30	24	32	27	23	29		33	33	28	19	8	22	9	26	0	17	0	8
Ig-like__35	4124	4213	90	35	21	29	30	28	25	20	25	21	0	20	14	18	0	19	20	22	25	21	20	28	22	25	27	28	27	33	35	34	35	31	24	30	33		32	33	22	20	14	24	25	13	15	0	12
Ig-like__36	4220	4310	91	29	24	26	26	18	26	24	16	18	11	20	12	18	16	10	8	15	14	0	17	17	11	17	28	25	27	32	31	29	33	29	25	29	33	32		37	16	14	14	12	23	12	0	0	11
Ig-like__37	4317	4406	90	28	23	22	19	31	21	28	22	22	12	24	19	20	16	14	17	0	16	18	23	20	16	23	24	28	29	33	32	25	29	27	27	33	28	33	37		20	10	27	16	15	15	0	0	17
Ig-like__38	4426	4515	90	28	22	22	32	24	29	22	22	26	27	0	20	20	23	4	17	0	0	22	0	26	8	29	21	25	26	17	20	23	20	29	17	26	19	22	16	20		15	19	0	10	8	20	0	0
Ig-like__39	4631	4699	69	0	14	19	21	16	14	6	12	21	11	18	23	17	16	13	20	25	17	21	17	25	15	20	16	21	19	21	6	21	18	16	22	18	8	20	14	10	15		16	25	21	0	26	0	19
Ig-like__40	4714	4798	85	25	23	21	21	24	15	11	15	0	18	27	19	19	23	21	20	23	20	23	18	25	16	21	22	28	17	21	20	19	23	14	20	16	22	14	14	27	19	16		16	24	18	0	0	18
Ig-like__41	4804	4890	87	33	26	19	27	23	16	0	18	19	0	24	25	17	17	19	20	24	23	26	25	26	30	22	27	27	30	21	0	22	18	9	19	24	9	24	12	16	0	25	16		31	17	23	0	21
Ig-like__42	5354	5445	92	32	17	19	24	18	16	16	26	16	0	33	23	18	18	31	18	18	24	27	19	35	14	24	23	21	15	17	26	23	22	22	20	22	26	25	23	15	10	21	24	31		16	16	0	19
Ig-like__43	5458	5525	68	14	16	18	17	13	15	0	8	0	0	0	8	14	20	17	16	14	8	13	0	18	17	14	16	0	0	17	21	17	14	4	21	14	0	13	12	15	8	0	18	17	16		16	0	0
Ig-like__44	5546	5619	74	14	19	0	15	17	18	10	0	0	14	16	20	0	20	12	23	22	17	19	21	21	10	0	18	23	21	14	13	24	16	20	0	21	17	15	0	0	20	26	0	23	16	16		0	13
Ig-like__45	5727	5733	7	0	0	0	0	0	0	0	0	0	0	0	0	0	6	0	0	0	0	0	0	0	0	0	0	0	0	0	0	0	0	0	0	0	0	0	0	0	0	0	0	0	0	0	0		0
Ig-like__46	5812	5876	65	13	14	19	5	5	0	9	0	15	19	23	20	16	17	20	18	22	19	18	17	17	14	15	20	0	11	15	16	10	0	10	19	22	8	12	11	17	0	19	18	21	19	0	13	0
Ig-like__47	5916	5976	61	20	15	18	0	15	6	0	16	7	0	16	20	17	16	18	17	14	14	20	16	20	17	13	14	16	13	18	21	16	14	11	20	13	14	16	18	17	17	20	16	21	14	17	20	0	16
Ig-like__48	5989	6072	84	14	8	4	8	10	20	11	0	24	5	13	18	13	0	23	0	23	14	21	18	25	0	20	0	7	20	8	2	12	13	20	15	12	0	0	10	17	0	18	19	17	19	0	21	0	20
Ig-like__49	6079	6161	83	23	17	18	13	21	19	25	19	16	16	32	25	22	28	27	28	26	19	27	28	30	21	0	21	22	20	0	0	21	3	0	0	23	10	24	21	21	20	20	20	23	23	16	24	0	23
Ig-like__50	6167	6250	84	0	13	0	5	0	0	11	0	22	14	33	24	18	16	27	24	27	25	25	20	25	13	19	16	0	14	0	22	19	11	0	15	21	12	25	7	13	0	17	22	18	28	15	18	6	38
Ig-like__51	6255	6339	85	24	23	24	20	22	12	21	25	0	0	23	20	21	24	25	24	0	20	23	20	30	17	24	17	13	22	22	28	15	24	17	21	17	28	23	21	24	24	19	27	18	26	20	20	0	20
Ig-like__52	6345	6428	84	0	15	3	7	0	8	0	0	18	0	15	20	15	18	27	23	23	18	25	21	24	0	0	0	0	0	5	0	0	2	9	11	0	0	16	11	0	2	0	17	19	16	7	6	0	25
Ig-like__53	6436	6507	72	21	0	28	0	16	19	0	13	24	17	22	21	17	20	22	21	22	20	17	22	22	15	20	13	20	16	17	19	20	20	17	19	23	19	22	9	15	14	23	19	24	21	21	19	6	29
Ig-like__54	6523	6607	85	21	20	23	20	13	14	23	18	20	20	28	28	23	26	28	30	27	29	27	29	31	24	23	19	27	23	22	23	23	27	12	21	19	10	18	22	22	0	23	27	28	26	0	24	0	30
Ig-like__55	6631	6695	65	4	13	12	14	14	10	0	6	0	5	21	13	15	16	23	17	15	0	20	21	18	19	19	0	20	19	13	14	15	13	6	12	19	16	15	0	13	14	0	15	13	15	4	0	0	11
Ig-like__56	6701	6784	84	22	18	31	17	20	19	8	17	13	13	29	25	21	23	24	29	0	22	24	18	25	18	20	22	28	22	24	25	18	16	22	21	18	26	23	15	19	19	16	29	24	30	18	26	0	18
Ig-like__57	6790	6790	1	0	0	0	0	0	0	0	0	0	0	0	0	0	0	0	0	0	0	0	0	0	0	0	0	0	0	0	0	0	0	0	0	0	0	0	0	0	0	0	0	0	0	0	0	0	0
Ig-like__58	6883	6966	84	0	20	18	25	27	19	7	0	19	23	21	21	22	25	0	19	25	0	29	32	18	22	25	23	32	23	15	0	23	24	19	21	0	21	5	14	18	19	23	27	26	21	20	18	0	22
Ig-like__59	6972	7055	84	20	24	17	17	24	15	22	15	24	19	21	20	24	22	27	23	17	25	27	33	28	23	16	24	23	7	17	17	25	24	5	12	13	5	23	13	19	23	18	26	24	20	18	24	0	13
Ig-like__60	7062	7131	70	19	16	19	18	0	11	0	0	20	21	28	24	20	23	26	24	26	17	19	23	21	15	20	19	21	18	17	20	16	18	15	18	17	15	19	12	18	19	21	29	24	23	22	23	0	25
Ig-like__61	7150	7232	83	0	16	12	14	0	13	13	9	0	17	17	21	14	21	28	22	18	32	18	20	20	16	11	17	15	12	18	7	18	13	15	11	9	18	11	8	9	16	17	19	20	21	18	19	0	22
Ig-like__62	7246	7323	78	14	12	13	20	6	0	0	5	14	0	0	10	0	9	8	16	5	8	0	0	0	9	7	0	17	0	0	15	2	10	0	0	15	16	2	13	10	17	13	14	12	8	2	14	0	0
Ig-like__63	7647	7721	75	17	17	23	19	17	17	20	0	18	0	0	9	7	13	8	0	10	8	9	7	14	7	15	14	0	16	12	0	15	13	14	18	17	18	21	14	14	18	12	15	9	7	12	0	0	4
Ig-like__64	7937	8017	81	22	23	19	19	23	20	29	12	19	21	4	14	17	15	8	16	9	6	0	0	17	16	24	15	16	21	18	20	23	17	16	23	20	15	21	14	20	22	12	13	13	10	17	13	0	0
name	fs	ls	n	Fibro_____1	Fibro_____2	Fibro_____3	Fibro_____4	Fibro_____5	Fibro_____6
				91	93	94	86	89	53
Ig-like___1	6	98	93	0	0	0	0	0	0
Ig-like___2	103	193	91	9	14	6	4	12	4
Ig-like___3	695	779	85	0	2	0	0	0	0
Ig-like___4	827	916	90	10	17	14	7	5	4
Ig-like___5	1037	1125	89	6	3	9	0	10	0
Ig-like___6	1185	1275	91	5	0	5	0	0	2
Ig-like___7	1284	1375	92	5	0	10	0	6	2
Ig-like___8	1431	1522	92	0	4	4	0	4	8
Ig-like___9	1569	1657	89	7	0	0	3	3	4
Ig-like__10	1805	1896	92	3	0	0	7	5	3
Ig-like__11	1902	1989	88	4	0	0	0	4	0
Ig-like__12	1995	2067	73	7	0	0	5	4	0
Ig-like__13	2082	2153	72	5	0	0	4	12	0
Ig-like__14	2173	2257	85	11	0	4	8	8	4
Ig-like__15	2261	2344	84	0	5	0	16	7	0
Ig-like__16	2349	2431	83	10	0	2	0	5	0
Ig-like__17	2435	2520	86	7	6	3	0	11	0
Ig-like__18	2523	2606	84	0	2	0	0	0	0
Ig-like__19	2610	2693	84	0	12	3	0	0	0
Ig-like__20	2698	2780	83	6	0	5	0	4	0
Ig-like__21	2786	2869	84	0	0	10	0	0	0
Ig-like__22	2882	2960	79	16	3	3	3	0	6
Ig-like__23	2966	3056	91	0	0	17	9	3	3
Ig-like__24	3072	3159	88	4	0	5	4	0	0
Ig-like__25	3187	3272	86	5	0	0	0	0	0
Ig-like__26	3276	3366	91	0	3	0	15	0	3
Ig-like__27	3370	3458	89	0	5	12	7	3	0
Ig-like__28	3463	3553	91	4	9	0	2	0	0
Ig-like__29	3558	3646	89	0	8	15	0	3	0
Ig-like__30	3653	3742	90	9	13	13	0	4	0
Ig-like__31	3746	3835	90	2	0	6	0	5	0
Ig-like__32	3840	3923	84	5	14	3	4	4	0
Ig-like__33	3932	4021	90	0	0	0	0	0	0
Ig-like__34	4028	4115	88	4	12	0	0	0	6
Ig-like__35	4124	4213	90	5	4	0	5	0	10
Ig-like__36	4220	4310	91	0	0	0	0	0	0
Ig-like__37	4317	4406	90	0	10	13	0	10	0
Ig-like__38	4426	4515	90	0	0	0	0	6	0
Ig-like__39	4631	4699	69	0	0	4	0	0	0
Ig-like__40	4714	4798	85	0	0	0	3	3	0
Ig-like__41	4804	4890	87	4	0	0	5	4	0
Ig-like__42	5354	5445	92	0	2	3	0	0	0
Ig-like__43	5458	5525	68	6	0	0	0	0	0
Ig-like__44	5546	5619	74	0	0	0	0	0	0
Ig-like__45	5727	5733	7	0	0	0	0	0	0
Ig-like__46	5812	5876	65	0	0	0	0	9	0
Ig-like__47	5916	5976	61	0	0	0	0	0	0
Ig-like__48	5989	6072	84	7	0	0	0	0	0
Ig-like__49	6079	6161	83	0	4	0	0	0	0
Ig-like__50	6167	6250	84	0	0	0	0	0	4
Ig-like__51	6255	6339	85	9	2	0	0	7	0
Ig-like__52	6345	6428	84	6	0	0	0	7	0
Ig-like__53	6436	6507	72	6	12	9	0	3	0
Ig-like__54	6523	6607	85	0	0	0	4	6	3
Ig-like__55	6631	6695	65	0	0	2	3	0	0
Ig-like__56	6701	6784	84	0	0	0	0	0	0
Ig-like__57	6790	6790	1	0	0	0	0	0	0
Ig-like__58	6883	6966	84	5	0	0	0	0	5
Ig-like__59	6972	7055	84	0	6	0	0	2	0
Ig-like__60	7062	7131	70	3	4	5	4	0	0
Ig-like__61	7150	7232	83	0	0	0	6	0	7
Ig-like__62	7246	7323	78	7	5	6	2	0	0
Ig-like__63	7647	7721	75	0	6	4	0	0	0
Ig-like__64	7937	8017	81	0	11	0	9	0	10
name	fs	ls	n	predic_Ig_0
				51
Ig-like___1	6	98	93	0
Ig-like___2	103	193	91	0
Ig-like___3	695	779	85	6
Ig-like___4	827	916	90	7
Ig-like___5	1037	1125	89	0
Ig-like___6	1185	1275	91	0
Ig-like___7	1284	1375	92	0
Ig-like___8	1431	1522	92	0
Ig-like___9	1569	1657	89	0
Ig-like__10	1805	1896	92	0
Ig-like__11	1902	1989	88	0
Ig-like__12	1995	2067	73	0
Ig-like__13	2082	2153	72	0
Ig-like__14	2173	2257	85	0
Ig-like__15	2261	2344	84	0
Ig-like__16	2349	2431	83	7
Ig-like__17	2435	2520	86	0
Ig-like__18	2523	2606	84	0
Ig-like__19	2610	2693	84	0
Ig-like__20	2698	2780	83	0
Ig-like__21	2786	2869	84	4
Ig-like__22	2882	2960	79	0
Ig-like__23	2966	3056	91	0
Ig-like__24	3072	3159	88	0
Ig-like__25	3187	3272	86	2
Ig-like__26	3276	3366	91	0
Ig-like__27	3370	3458	89	2
Ig-like__28	3463	3553	91	0
Ig-like__29	3558	3646	89	0
Ig-like__30	3653	3742	90	0
Ig-like__31	3746	3835	90	10
Ig-like__32	3840	3923	84	2
Ig-like__33	3932	4021	90	0
Ig-like__34	4028	4115	88	0
Ig-like__35	4124	4213	90	0
Ig-like__36	4220	4310	91	0
Ig-like__37	4317	4406	90	0
Ig-like__38	4426	4515	90	0
Ig-like__39	4631	4699	69	0
Ig-like__40	4714	4798	85	4
Ig-like__41	4804	4890	87	2
Ig-like__42	5354	5445	92	0
Ig-like__43	5458	5525	68	0
Ig-like__44	5546	5619	74	0
Ig-like__45	5727	5733	7	0
Ig-like__46	5812	5876	65	0
Ig-like__47	5916	5976	61	0
Ig-like__48	5989	6072	84	5
Ig-like__49	6079	6161	83	0
Ig-like__50	6167	6250	84	0
Ig-like__51	6255	6339	85	0
Ig-like__52	6345	6428	84	0
Ig-like__53	6436	6507	72	0
Ig-like__54	6523	6607	85	4
Ig-like__55	6631	6695	65	0
Ig-like__56	6701	6784	84	3
Ig-like__57	6790	6790	1	0
Ig-like__58	6883	6966	84	0
Ig-like__59	6972	7055	84	0
Ig-like__60	7062	7131	70	0
Ig-like__61	7150	7232	83	5
Ig-like__62	7246	7323	78	0
Ig-like__63	7647	7721	75	0
Ig-like__64	7937	8017	81	4
name	fs	ls	n	THB_______0
				31
Ig-like___1	6	98	93	0
Ig-like___2	103	193	91	0
Ig-like___3	695	779	85	0
Ig-like___4	827	916	90	0
Ig-like___5	1037	1125	89	0
Ig-like___6	1185	1275	91	0
Ig-like___7	1284	1375	92	7
Ig-like___8	1431	1522	92	0
Ig-like___9	1569	1657	89	0
Ig-like__10	1805	1896	92	0
Ig-like__11	1902	1989	88	5
Ig-like__12	1995	2067	73	0
Ig-like__13	2082	2153	72	0
Ig-like__14	2173	2257	85	0
Ig-like__15	2261	2344	84	5
Ig-like__16	2349	2431	83	0
Ig-like__17	2435	2520	86	0
Ig-like__18	2523	2606	84	6
Ig-like__19	2610	2693	84	0
Ig-like__20	2698	2780	83	0
Ig-like__21	2786	2869	84	0
Ig-like__22	2882	2960	79	0
Ig-like__23	2966	3056	91	0
Ig-like__24	3072	3159	88	0
Ig-like__25	3187	3272	86	0
Ig-like__26	3276	3366	91	0
Ig-like__27	3370	3458	89	0
Ig-like__28	3463	3553	91	0
Ig-like__29	3558	3646	89	0
Ig-like__30	3653	3742	90	0
Ig-like__31	3746	3835	90	0
Ig-like__32	3840	3923	84	0
Ig-like__33	3932	4021	90	0
Ig-like__34	4028	4115	88	5
Ig-like__35	4124	4213	90	0
Ig-like__36	4220	4310	91	0
Ig-like__37	4317	4406	90	0
Ig-like__38	4426	4515	90	0
Ig-like__39	4631	4699	69	0
Ig-like__40	4714	4798	85	0
Ig-like__41	4804	4890	87	0
Ig-like__42	5354	5445	92	0
Ig-like__43	5458	5525	68	0
Ig-like__44	5546	5619	74	0
Ig-like__45	5727	5733	7	0
Ig-like__46	5812	5876	65	0
Ig-like__47	5916	5976	61	0
Ig-like__48	5989	6072	84	0
Ig-like__49	6079	6161	83	0
Ig-like__50	6167	6250	84	0
Ig-like__51	6255	6339	85	0
Ig-like__52	6345	6428	84	0
Ig-like__53	6436	6507	72	0
Ig-like__54	6523	6607	85	0
Ig-like__55	6631	6695	65	7
Ig-like__56	6701	6784	84	0
Ig-like__57	6790	6790	1	0
Ig-like__58	6883	6966	84	0
Ig-like__59	6972	7055	84	0
Ig-like__60	7062	7131	70	0
Ig-like__61	7150	7232	83	0
Ig-like__62	7246	7323	78	0
Ig-like__63	7647	7721	75	0
Ig-like__64	7937	8017	81	0
name	fs	ls	n	Titin_Z___0
				40
Ig-like___1	6	98	93	0
Ig-like___2	103	193	91	5
Ig-like___3	695	779	85	0
Ig-like___4	827	916	90	0
Ig-like___5	1037	1125	89	0
Ig-like___6	1185	1275	91	0
Ig-like___7	1284	1375	92	0
Ig-like___8	1431	1522	92	0
Ig-like___9	1569	1657	89	0
Ig-like__10	1805	1896	92	0
Ig-like__11	1902	1989	88	0
Ig-like__12	1995	2067	73	0
Ig-like__13	2082	2153	72	0
Ig-like__14	2173	2257	85	0
Ig-like__15	2261	2344	84	0
Ig-like__16	2349	2431	83	0
Ig-like__17	2435	2520	86	0
Ig-like__18	2523	2606	84	0
Ig-like__19	2610	2693	84	0
Ig-like__20	2698	2780	83	0
Ig-like__21	2786	2869	84	0
Ig-like__22	2882	2960	79	0
Ig-like__23	2966	3056	91	0
Ig-like__24	3072	3159	88	0
Ig-like__25	3187	3272	86	0
Ig-like__26	3276	3366	91	0
Ig-like__27	3370	3458	89	0
Ig-like__28	3463	3553	91	0
Ig-like__29	3558	3646	89	0
Ig-like__30	3653	3742	90	0
Ig-like__31	3746	3835	90	0
Ig-like__32	3840	3923	84	0
Ig-like__33	3932	4021	90	0
Ig-like__34	4028	4115	88	0
Ig-like__35	4124	4213	90	0
Ig-like__36	4220	4310	91	0
Ig-like__37	4317	4406	90	0
Ig-like__38	4426	4515	90	7
Ig-like__39	4631	4699	69	0
Ig-like__40	4714	4798	85	0
Ig-like__41	4804	4890	87	0
Ig-like__42	5354	5445	92	0
Ig-like__43	5458	5525	68	0
Ig-like__44	5546	5619	74	0
Ig-like__45	5727	5733	7	0
Ig-like__46	5812	5876	65	0
Ig-like__47	5916	5976	61	0
Ig-like__48	5989	6072	84	0
Ig-like__49	6079	6161	83	0
Ig-like__50	6167	6250	84	0
Ig-like__51	6255	6339	85	0
Ig-like__52	6345	6428	84	0
Ig-like__53	6436	6507	72	2
Ig-like__54	6523	6607	85	5
Ig-like__55	6631	6695	65	8
Ig-like__56	6701	6784	84	0
Ig-like__57	6790	6790	1	0
Ig-like__58	6883	6966	84	0
Ig-like__59	6972	7055	84	0
Ig-like__60	7062	7131	70	0
Ig-like__61	7150	7232	83	0
Ig-like__62	7246	7323	78	0
Ig-like__63	7647	7721	75	0
Ig-like__64	7937	8017	81	5
name	fs	ls	n	none_____10	none______0	none______1	none______2	none______3	none______4	none______5	none______6	none______7	none______8	none______9
				107	50	56	254	47	120	59	55	147	53	198
Ig-like___1	6	98	93	0	0	0	6	11	0	0	0	7	0	0
Ig-like___2	103	193	91	0	0	0	0	4	0	0	5	0	0	0
Ig-like___3	695	779	85	0	0	0	9	4	0	0	0	0	14	0
Ig-like___4	827	916	90	9	0	0	8	0	0	0	0	0	0	0
Ig-like___5	1037	1125	89	0	0	0	5	0	0	0	0	3	0	3
Ig-like___6	1185	1275	91	24	0	0	0	0	0	0	0	0	0	0
Ig-like___7	1284	1375	92	0	0	0	13	0	0	0	0	0	0	0
Ig-like___8	1431	1522	92	0	0	0	0	0	5	0	0	0	0	4
Ig-like___9	1569	1657	89	26	0	0	0	4	0	0	3	0	0	0
Ig-like__10	1805	1896	92	0	3	0	5	0	0	0	0	7	0	5
Ig-like__11	1902	1989	88	0	0	0	4	0	0	0	0	0	0	0
Ig-like__12	1995	2067	73	24	0	0	5	0	0	0	0	0	0	5
Ig-like__13	2082	2153	72	11	0	0	6	0	0	0	0	0	0	0
Ig-like__14	2173	2257	85	17	0	0	9	0	0	4	0	0	0	0
Ig-like__15	2261	2344	84	25	0	0	7	0	0	0	0	0	0	0
Ig-like__16	2349	2431	83	26	0	0	0	0	0	3	9	0	0	0
Ig-like__17	2435	2520	86	4	2	0	10	0	0	0	0	5	0	0
Ig-like__18	2523	2606	84	18	0	0	4	0	0	0	5	5	0	4
Ig-like__19	2610	2693	84	21	0	0	13	0	0	0	0	0	5	5
Ig-like__20	2698	2780	83	22	0	0	0	0	0	0	0	8	0	3
Ig-like__21	2786	2869	84	26	0	0	0	0	0	0	5	8	8	4
Ig-like__22	2882	2960	79	9	0	0	0	4	5	0	0	0	5	0
Ig-like__23	2966	3056	91	0	0	0	0	4	4	0	0	0	0	10
Ig-like__24	3072	3159	88	21	0	0	0	0	0	3	0	0	0	0
Ig-like__25	3187	3272	86	21	0	0	0	0	0	0	7	0	0	5
Ig-like__26	3276	3366	91	0	0	6	6	0	0	0	0	6	0	6
Ig-like__27	3370	3458	89	10	0	0	8	0	0	0	0	0	0	5
Ig-like__28	3463	3553	91	23	0	0	8	0	4	0	0	0	5	0
Ig-like__29	3558	3646	89	8	0	0	4	0	0	0	8	0	0	6
Ig-like__30	3653	3742	90	0	0	4	0	0	0	0	0	4	0	7
Ig-like__31	3746	3835	90	23	0	0	0	0	0	0	0	0	0	0
Ig-like__32	3840	3923	84	13	0	0	0	0	0	4	0	0	0	4
Ig-like__33	3932	4021	90	21	0	0	4	0	0	0	0	0	0	0
Ig-like__34	4028	4115	88	0	0	0	0	0	0	0	0	0	0	0
Ig-like__35	4124	4213	90	6	0	0	0	0	10	4	0	0	0	3
Ig-like__36	4220	4310	91	5	0	6	0	0	0	0	0	0	0	0
Ig-like__37	4317	4406	90	20	0	0	0	0	0	0	0	0	0	0
Ig-like__38	4426	4515	90	9	0	0	0	0	0	0	0	0	0	9
Ig-like__39	4631	4699	69	0	0	0	4	0	0	0	0	0	0	0
Ig-like__40	4714	4798	85	18	0	4	0	3	0	0	0	0	0	4
Ig-like__41	4804	4890	87	19	0	0	0	0	0	0	0	0	0	0
Ig-like__42	5354	5445	92	22	0	0	10	0	0	3	0	3	0	4
Ig-like__43	5458	5525	68	10	0	0	5	0	0	0	0	0	0	0
Ig-like__44	5546	5619	74	22	0	4	4	4	9	4	6	7	0	0
Ig-like__45	5727	5733	7	5	0	0	0	0	0	0	0	0	0	0
Ig-like__46	5812	5876	65	23	0	0	6	0	0	0	2	0	0	14
Ig-like__47	5916	5976	61	14	0	0	5	0	0	0	0	0	0	0
Ig-like__48	5989	6072	84	42	0	0	3	0	0	5	4	0	0	0
Ig-like__49	6079	6161	83	27	0	0	17	0	0	2	0	11	0	8
Ig-like__50	6167	6250	84	26	0	0	6	0	8	0	0	0	0	5
Ig-like__51	6255	6339	85	27	0	0	0	0	0	0	0	6	0	0
Ig-like__52	6345	6428	84	50	0	0	5	0	0	0	7	0	0	0
Ig-like__53	6436	6507	72	36	0	0	0	12	0	0	0	6	0	3
Ig-like__54	6523	6607	85	29	5	0	0	2	0	0	0	0	0	5
Ig-like__55	6631	6695	65	0	0	0	0	0	0	0	0	0	0	0
Ig-like__56	6701	6784	84	25	0	0	0	0	0	0	0	0	0	4
Ig-like__57	6790	6790	1	0	0	0	0	0	0	0	0	0	0	0
Ig-like__58	6883	6966	84	11	0	0	0	0	7	0	0	0	0	0
Ig-like__59	6972	7055	84	17	0	0	0	0	0	0	0	4	0	0
Ig-like__60	7062	7131	70	14	0	0	0	0	0	0	0	0	0	0
Ig-like__61	7150	7232	83	20	0	0	0	0	9	0	0	6	0	4
Ig-like__62	7246	7323	78	0	0	0	9	0	0	0	0	3	0	0
Ig-like__63	7647	7721	75	6	0	0	4	0	0	0	0	0	0	0
Ig-like__64	7937	8017	81	10	0	0	0	0	5	0	3	6	0	11
name	fs	ls	n	Fibro_____1	Fibro_____2	Fibro_____3	Fibro_____4	Fibro_____5	Fibro_____6
				91	93	94	86	89	53
Fibro_____1	7327	7417	91		37	33	40	27	20
Fibro_____2	7428	7520	93	37		28	35	38	22
Fibro_____3	7529	7622	94	33	28		35	35	17
Fibro_____4	7725	7810	86	40	35	35		27	18
Fibro_____5	7825	7913	89	27	38	35	27		17
Fibro_____6	8021	8073	53	20	22	17	18	17
name	fs	ls	n	predic_Ig_0
				51
Fibro_____1	7327	7417	91	7
Fibro_____2	7428	7520	93	0
Fibro_____3	7529	7622	94	0
Fibro_____4	7725	7810	86	0
Fibro_____5	7825	7913	89	11
Fibro_____6	8021	8073	53	0
name	fs	ls	n	THB_______0
				31
Fibro_____1	7327	7417	91	0
Fibro_____2	7428	7520	93	0
Fibro_____3	7529	7622	94	0
Fibro_____4	7725	7810	86	0
Fibro_____5	7825	7913	89	0
Fibro_____6	8021	8073	53	0
name	fs	ls	n	Titin_Z___0
				40
Fibro_____1	7327	7417	91	0
Fibro_____2	7428	7520	93	3
Fibro_____3	7529	7622	94	0
Fibro_____4	7725	7810	86	0
Fibro_____5	7825	7913	89	0
Fibro_____6	8021	8073	53	0
name	fs	ls	n	none_____10	none______0	none______1	none______2	none______3	none______4	none______5	none______6	none______7	none______8	none______9
				107	50	56	254	47	120	59	55	147	53	198
Fibro_____1	7327	7417	91	4	0	0	12	7	5	0	0	5	0	2
Fibro_____2	7428	7520	93	4	0	0	0	0	0	0	5	8	0	0
Fibro_____3	7529	7622	94	0	0	0	0	0	0	0	2	0	0	2
Fibro_____4	7725	7810	86	0	0	0	9	0	2	0	0	4	0	6
Fibro_____5	7825	7913	89	4	0	0	7	0	3	0	0	8	0	5
Fibro_____6	8021	8073	53	0	0	0	4	0	0	0	0	6	0	4
name	fs	ls	n	predic_Ig_0
				51
predic_Ig_0	5089	5139	51
name	fs	ls	n	THB_______0
				31
predic_Ig_0	5089	5139	51	0
name	fs	ls	n	Titin_Z___0
				40
predic_Ig_0	5089	5139	51	6
name	fs	ls	n	none_____10	none______0	none______1	none______2	none______3	none______4	none______5	none______6	none______7	none______8	none______9
				107	50	56	254	47	120	59	55	147	53	198
predic_Ig_0	5089	5139	51	0	0	0	0	0	3	0	2	4	0	6
name	fs	ls	n	THB_______0
				31
THB_______0	4547	4577	31
name	fs	ls	n	Titin_Z___0
				40
THB_______0	4547	4577	31	0
name	fs	ls	n	none_____10	none______0	none______1	none______2	none______3	none______4	none______5	none______6	none______7	none______8	none______9
				107	50	56	254	47	120	59	55	147	53	198
THB_______0	4547	4577	31	0	0	0	0	0	0	0	0	0	0	0
name	fs	ls	n	Titin_Z___0
				40
Titin_Z___0	401	440	40
name	fs	ls	n	none_____10	none______0	none______1	none______2	none______3	none______4	none______5	none______6	none______7	none______8	none______9
				107	50	56	254	47	120	59	55	147	53	198
Titin_Z___0	401	440	40	0	0	0	5	0	0	0	5	5	0	11
name	fs	ls	n	none_____10	none______0	none______1	none______2	none______3	none______4	none______5	none______6	none______7	none______8	none______9
				107	50	56	254	47	120	59	55	147	53	198
none_____10	5620	5726	107		7	7	7	0	5	0	0	0	0	10
none______0	194	243	50	7		0	10	0	0	0	0	0	5	0
none______1	345	400	56	7	0		0	15	0	0	0	3	0	7
none______2	441	694	254	7	10	0		0	11	0	3	17	0	6
none______3	780	826	47	0	0	0	0		0	0	0	5	11	4
none______4	917	1036	120	5	0	0	11	0		0	0	4	9	4
none______5	1126	1184	59	0	0	0	0	0	0		3	4	0	0
none______6	1376	1430	55	0	0	0	3	0	0	3		8	0	4
none______7	1658	1804	147	0	0	2	17	5	0	0	8		6	11
none______8	4578	4630	53	0	5	0	0	11	9	0	0	6		11
none______9	4891	5088	198	10	0	7	6	4	4	0	8	11	11
[truncated: 18 more columns]

## Sheet: id_pc_titin_chick
name	fs	ls	n	PRK12323__0
				101
PRK12323__0	244	344	101
name	fs	ls	n	Ig-like___1	Ig-like___2	Ig-like___3	Ig-like___4	Ig-like___5	Ig-like___6	Ig-like___7	Ig-like___8	Ig-like___9	Ig-like__10	Ig-like__11	Ig-like__12	Ig-like__13	Ig-like__14	Ig-like__15	Ig-like__16	Ig-like__17	Ig-like__18	Ig-like__19	Ig-like__20	Ig-like__21	Ig-like__22	Ig-like__23	Ig-like__24	Ig-like__25	Ig-like__26	Ig-like__27	Ig-like__28	Ig-like__29	Ig-like__30	Ig-like__31	Ig-like__32	Ig-like__33	Ig-like__34	Ig-like__35	Ig-like__36	Ig-like__37	Ig-like__38	Ig-like__39	Ig-like__40	Ig-like__41	Ig-like__42	Ig-like__43	Ig-like__44	Ig-like__45	Ig-like__46
				93	91	85	90	89	91	92	92	89	92	88	73	72	85	84	83	86	84	84	83	84	79	91	88	86	91	89	91	89	90	90	84	90	88	90	91	90	90	69	85	87	92	68	74	7	65
PRK12323__0	244	344	101	0	0.104167	0	0	0.042105	0	0	0	0	0	0	0	0	0	0	0	0	0	0	0	0	0	0.052083	0	0.053476	0.0625	0.031579	0	0.042105	0	0	0	0	0	0.031414	0	0	0	0	0	0	0	0	0	0	0
name	fs	ls	n	Fibro_____1	Fibro_____2	Fibro_____3	Fibro_____4	Fibro_____5	Fibro_____6
				91	93	94	86	89	53
PRK12323__0	244	344	101	0	0	0	0.074866	0	0
name	fs	ls	n	predic_Ig_0
				51
PRK12323__0	244	344	101	0
name	fs	ls	n	THB_______0
				31
PRK12323__0	244	344	101	0
name	fs	ls	n	Titin_Z___0
				40
PRK12323__0	244	344	101	0.141844
name	fs	ls	n	none_____10	none______0	none______1	none______2	none______3	none______4	none______5	none______6	none______7	none______8	none______9
				107	50	56	254	47	120	59	55	147	53	198
PRK12323__0	244	344	101	0.057692	0	0	0.028169	0	0.036199	0.05	0	0.024194	0	0.060201
name	fs	ls	n	Ig-like___1	Ig-like___2	Ig-like___3	Ig-like___4	Ig-like___5	Ig-like___6	Ig-like___7	Ig-like___8	Ig-like___9	Ig-like__10	Ig-like__11	Ig-like__12	Ig-like__13	Ig-like__14	Ig-like__15	Ig-like__16	Ig-like__17	Ig-like__18	Ig-like__19	Ig-like__20	Ig-like__21	Ig-like__22	Ig-like__23	Ig-like__24	Ig-like__25	Ig-like__26	Ig-like__27	Ig-like__28	Ig-like__29	Ig-like__30	Ig-like__31	Ig-like__32	Ig-like__33	Ig-like__34	Ig-like__35	Ig-like__36	Ig-like__37	Ig-like__38	Ig-like__39	Ig-like__40	Ig-like__41	Ig-like__42	Ig-like__43	Ig-like__44	Ig-like__45	Ig-like__46
				93	91	85	90	89	91	92	92	89	92	88	73	72	85	84	83	86	84	84	83	84	79	91	88	86	91	89	91	89	90	90	84	90	88	90	91	90	90	69	85	87	92	68	74	7	65
Ig-like___1	6	98	93		0.402174	0.370787	0.273224	0.318681	0.293478	0.27027	0.313514	0.230769	0.313514	0.320442	0	0.230303	0.224719	0	0.204545	0.134078	0.259887	0.248588	0	0.338983	0.162791	0.413043	0.342541	0.268156	0.271739	0.252747	0.293478	0.285714	0.31694	0.327869	0.225989	0.349727	0.342541	0.382514	0.315217	0.306011	0.306011	0	0.280899	0.366667	0.345946	0.173913	0.167665	0	0.164557
Ig-like___2	103	193	91	0.402174		0.363636	0.209945	0.333333	0.32967	0.251366	0.306011	0.266667	0.327869	0.167598	0.134146	0.331288	0.159091	0.228571	0.091954	0.158192	0.217143	0.262857	0	0.24	0.2	0.318681	0.413408	0.259887	0.285714	0.277778	0	0.255556	0.320442	0.220994	0.228571	0.243094	0.223464	0.232044	0.263736	0.254144	0.243094	0.175	0.261364	0.292135	0.185792	0.201258	0.230303	0	0.179487
Ig-like___3	695	779	85	0.370787	0.363636		0.274286	0.310345	0.261364	0.293785	0.271186	0.275862	0.271186	0.242775	0.21519	0.280255	0.329412	0.224852	0.238095	0.269006	0.16568	0.236686	0	0.260355	0	0.340909	0.312139	0.233918	0.340909	0.264368	0.238636	0.310345	0.308571	0.274286	0.284024	0.32	0.277457	0.331429	0.295455	0.251429	0.251429	0.246753	0.247059	0.22093	0.214689	0.235294	0	0	0.253333
Ig-like___4	827	916	90	0.273224	0.209945	0.274286		0.256983	0.320442	0.230769	0.307692	0.268156	0.241758	0.179775	0.184049	0.024691	0.182857	0.183908	0.312139	0.125	0.264368	0.252874	0	0.298851	0.213018	0.265193	0.247191	0.238636	0.320442	0.268156	0.243094	0.346369	0.322222	0.288889	0.275862	0.3	0.292135	0.333333	0.287293	0.211111	0.355556	0.264151	0.24	0.305085	0.263736	0.21519	0.182927	0	0.064516
Ig-like___5	1037	1125	89	0.318681	0.333333	0.310345	0.256983		0.288889	0.309392	0.309392	0.292135	0.243094	0.158192	0	0.248447	0.206897	0	0.27907	0.182857	0.265896	0.265896	0	0.289017	0.22619	0.311111	0.327684	0.262857	0.288889	0.269663	0.266667	0.258427	0.324022	0.268156	0.254335	0.256983	0.305085	0.312849	0.2	0.346369	0.268156	0.202532	0.275862	0.261364	0.198895	0.165605	0.208589	0	0.064935
Ig-like___6	1185	1275	91	0.293478	0.32967	0.261364	0.320442	0.288889		0	0.31694	0.333333	0.338798	0.055866	0	0	0.238636	0.171429	0.195402	0	0.228571	0.285714	0	0.217143	0.141176	0.307692	0.256983	0.225989	0.318681	0.233333	0.230769	0.333333	0.309392	0.287293	0.217143	0.265193	0.301676	0.276243	0.285714	0.232044	0.320442	0.175	0.170455	0.179775	0.174863	0.188679	0.218182	0	0
Ig-like___7	1284	1375	92	0.27027	0.251366	0.293785	0.230769	0.309392	0		0.23913	0.254144	0.25	0.222222	0.048485	0	0.282486	0.056818	0.205714	0.202247	0	0.193182	0.171429	0	0	0.262295	0.222222	0.213483	0.251366	0.232044	0.251366	0.232044	0.241758	0.197802	0.272727	0.208791	0.244444	0.21978	0.262295	0.307692	0.241758	0.074534	0.124294	0	0.173913	0	0.120482	0	0.11465
Ig-like___8	1431	1522	92	0.313514	0.306011	0.271186	0.307692	0.309392	0.31694	0.23913		0.220994	0.271739	0	0.181818	0.109756	0.101695	0.204545	0.171429	0	0.079545	0.25	0.102857	0.295455	0.035088	0.295082	0.222222	0.202247	0.31694	0.232044	0.262295	0.220994	0.318681	0.153846	0.215909	0.252747	0.233333	0.274725	0.174863	0.241758	0.241758	0.149068	0.169492	0.201117	0.282609	0.1	0	0	0
Ig-like___9	1569	1657	89	0.230769	0.266667	0.275862	0.268156	0.292135	0.333333	0.254144	0.220994		0.254144	0.169492	0.234568	0.198758	0.16092	0	0	0	0	0.231214	0.104651	0	0	0.255556	0.350282	0.251429	0.233333	0.235955	0.255556	0.202247	0.223464	0.268156	0.219653	0.256983	0.169492	0.234637	0.2	0.24581	0.290503	0.265823	0	0.215909	0.176796	0	0	0	0.194805
Ig-like__10	1805	1896	92	0.313514	0.327869	0.271186	0.241758	0.243094	0.338798	0.25	0.271739	0.254144		0.066667	0.145455	0.231707	0.112994	0	0.16	0.258427	0	0.170455	0.217143	0.215909	0.210526	0.273224	0.255556	0	0.240437	0.220994	0.218579	0.265193	0.307692	0.263736	0.181818	0.252747	0.122222	0	0.120219	0.131868	0.296703	0.136646	0.20339	0	0	0	0.168675	0	0.242038
Ig-like__11	1902	1989	88	0.320442	0.167598	0.242775	0.179775	0.158192	0.055866	0.222222	0	0.169492	0.066667		0.298137	0.2375	0.265896	0.325581	0.304094	0.229885	0.267442	0.209302	0.304094	0.372093	0.275449	0.223464	0.215909	0.310345	0.301676	0.214689	0.067039	0.180791	0.292135	0.191011	0.244186	0.224719	0.272727	0.224719	0.223464	0.269663	0	0.229299	0.312139	0.274286	0.366667	0	0.197531	0	0.300654
Ig-like__12	1995	2067	73	0	0.134146	0.21519	0.184049	0	0	0.048485	0.181818	0.234568	0.145455	0.298137		0.289655	0.291139	0.292994	0.307692	0.289308	0.292994	0.254777	0.307692	0.254777	0.302632	0	0.223602	0.251572	0.280488	0.246914	0.121951	0.283951	0.245399	0.159509	0.242038	0.282209	0.198758	0.171779	0.146341	0.233129	0.245399	0.323944	0.240506	0.3125	0.278788	0.113475	0.272109	0	0.289855
Ig-like__13	2082	2153	72	0.230303	0.331288	0.280255	0.024691	0.248447	0	0	0.109756	0.198758	0.231707	0.2375	0.289655		0.280255	0.230769	0.270968	0.265823	0.217949	0.282051	0.309677	0.307692	0	0.134969	0.2125	0.189873	0.233129	0.136646	0	0.26087	0.17284	0.222222	0.166667	0.098765	0.075	0.222222	0.220859	0.246914	0.246914	0.241135	0.242038	0.213836	0.219512	0.2	0	0	0.233577
Ig-like__14	2173	2257	85	0.224719	0.159091	0.329412	0.182857	0.206897	0.238636	0.282486	0.101695	0.16092	0.112994	0.265896	0.291139	0.280255		0.248521	0.297619	0.25731	0.236686	0.035503	0.27381	0.319527	0.256098	0.238636	0.312139	0.187135	0.147727	0.137931	0	0.172414	0.228571	0.08	0	0.274286	0.184971	0	0.181818	0.182857	0.262857	0.207792	0.270588	0.197674	0.20339	0.261438	0.251572	0.130435	0.226667
Ig-like__15	2261	2344	84	0	0.228571	0.224852	0.183908	0	0.171429	0.056818	0.204545	0	0	0.325581	0.292994	0.230769	0.248521		0.311377	0.317647	0.357143	0.321429	0.323353	0.321429	0.269939	0.034286	0.267442	0.2	0.194286	0.17341	0.205714	0.16185	0.183908	0.126437	0.154762	0.149425	0.255814	0.218391	0.114286	0.16092	0.045977	0.169935	0.248521	0.222222	0.352273	0.223684	0.151899	0	0.268456
Ig-like__16	2349	2431	83	0.204545	0.091954	0.285714	0.312139	0.27907	0.195402	0.205714	0.171429	0	0.16	0.304094	0.307692	0.270968	0.297619	0.311377		0.366864	0.263473	0.299401	0.301205	0.359281	0.283951	0.057471	0	0.284024	0.218391	0.139535	0.045977	0.232558	0.196532	0.046243	0.263473	0.219653	0.222222	0.231214	0.091954	0.196532	0.196532	0.263158	0.238095	0.235294	0.205714	0.211921	0.292994	0	0.243243
Ig-like__17	2435	2520	86	0.134078	0.158192	0.269006	0.125	0.182857	0	0.202247	0	0	0.258427	0.229885	0.289308	0.265823	0.25731	0.317647	0.366864		0.305882	0.388235	0.331361	0.329412	0.242424	0.237288	0.206897	0.337209	0.169492	0.125714	0	0.251429	0.136364	0.147727	0.176471	0.102273	0	0.25	0.169492	0	0	0.322581	0.269006	0.277457	0.202247	0.181818	0.275	0	0.291391
Ig-like__18	2523	2606	84	0.259887	0.217143	0.16568	0.264368	0.265896	0.228571	0	0.079545	0	0	0.267442	0.292994	0.217949	0.236686	0.357143	0.263473	0.305882		0.369048	0.275449	0.297619	0.220859	0.228571	0.255814	0.188235	0.171429	0.254335	0.274286	0.358382	0.218391	0.310345	0.178571	0.172414	0.209302	0.287356	0.16	0.183908	0	0.222222	0.236686	0.269006	0.272727	0.105263	0.21519	0	0.255034
Ig-like__19	2610	2693	84	0.248588	0.262857	0.236686	0.252874	0.265896	0.285714	0.193182	0.25	0.231214	0.170455	0.209302	0.254777	0.282051	0.035503	0.321429	0.299401	0.388235	0.369048		0.39521	0.357143	0.331288	0.285714	0.244186	0.282353	0.262857	0.17341	0	0.208092	0	0.137931	0.261905	0.172414	0.139535	0.241379	0	0.206897	0.252874	0.27451	0.272189	0.304094	0.306818	0.171053	0.240506	0	0.241611
Ig-like__20	2698	2780	83	0	0	0	0	0	0	0.171429	0.102857	0.104651	0.217143	0.304094	0.307692	0.309677	0.27381	0.323353	0.301205	0.331361	0.275449	0.39521		0.323353	0.333333	0.172414	0.245614	0.319527	0.206897	0.186047	0.034483	0.267442	0	0.242775	0.287425	0.17341	0	0.231214	0.195402	0.265896	0	0.223684	0.214286	0.294118	0.217143	0	0.267516	0	0.22973
Ig-like__21	2786	2869	84	0.338983	0.24	0.260355	0.298851	0.289017	0.217143	0	0.295455	0	0.215909	0.372093	0.254777	0.307692	0.319527	0.321429	0.359281	0.329412	0.297619	0.357143	0.323353		0.429448	0.285714	0.244186	0.329412	0.228571	0.242775	0.24	0.231214	0.310345	0.137931	0.261905	0.241379	0.267442	0.321839	0.194286	0.229885	0.298851	0.326797	0.295858	0.304094	0.397727	0.236842	0.265823	0	0.228188
Ig-like__22	2882	2960	79	0.162791	0.2	0	0.213018	0.22619	0.141176	0	0.035088	0	0.210526	0.275449	0.302632	0	0.256098	0.269939	0.283951	0.242424	0.220859	0.331288	0.333333	0.429448		0.188235	0.311377	0.254545	0.211765	0	0	0.190476	0.201183	0.142012	0	0.213018	0.179641	0.260355	0.129412	0.189349	0.094675	0.202703	0.195122	0.361446	0.163743	0.231293	0.130719	0	0.194444
Ig-like__23	2966	3056	91	0.413043	0.318681	0.340909	0.265193	0.311111	0.307692	0.262295	0.295082	0.255556	0.273224	0.223464	0	0.134969	0.238636	0.034286	0.057471	0.237288	0.228571	0.285714	0.172414	0.285714	0.188235		0.324022	0.259887	0.32967	0.222222	0.252747	0.3	0.287293	0.298343	0.228571	0.331492	0.256983	0.276243	0.186813	0.254144	0.320442	0.25	0.238636	0.247191	0.262295	0.176101	0	0	0.192308
Ig-like__24	3072	3159	88	0.342541	0.413408	0.312139	0.247191	0.327684	0.256983	0.222222	0.222222	0.350282	0.255556	0.215909	0.223602	0.2125	0.312139	0.267442	0	0.206897	0.255814	0.244186	0.245614	0.244186	0.311377	0.324022		0.344828	0.27933	0.225989	0	0.293785	0.280899	0.235955	0.255814	0.303371	0.261364	0.303371	0.312849	0.269663	0.235955	0.203822	0.254335	0.308571	0.255556	0.205128	0.222222	0	0.261438
Ig-like__25	3187	3272	86	0.268156	0.259887	0.233918	0.238636	0.262857	0.225989	0.213483	0.202247	0.251429	0	0.310345	0.251572	0.189873	0.187135	0.2	0.284024	0.337209	0.188235	0.282353	0.319527	0.329412	0.254545	0.259887	0.344828		0.327684	0.342857	0.248588	0.32	0.329545	0.284091	0.235294	0.318182	0.241379	0.318182	0.282486	0.318182	0.284091	0.270968	0.327485	0.312139	0.235955	0	0.2875	0	0
Ig-like__26	3276	3366	91	0.271739	0.285714	0.340909	0.320442	0.288889	0.318681	0.251366	0.31694	0.233333	0.240437	0.301676	0.280488	0.233129	0.147727	0.194286	0.218391	0.169492	0.171429	0.262857	0.206897	0.228571	0.211765	0.32967	0.27933	0.327684		0.333333	0.318681	0.344444	0.38674	0.364641	0.32	0.364641	0.256983	0.298343	0.296703	0.320442	0.287293	0.2375	0.193182	0.337079	0.163934	0	0.254545	0	0.141026
Ig-like__27	3370	3458	89	0.252747	0.277778	0.264368	0.268156	0.269663	0.233333	0.232044	0.232044	0.235955	0.220994	0.214689	0.246914	0.136646	0.137931	0.17341	0.139535	0.125714	0.254335	0.17341	0.186047	0.242775	0	0.222222	0.225989	0.342857	0.333333		0.322222	0.359551	0.346369	0.256983	0.312139	0.335196	0.293785	0.368715	0.355556	0.368715	0.189944	0.265823	0.241379	0.238636	0.187845	0.216561	0.171779	0	0.194805
Ig-like__28	3463	3553	91	0.293478	0	0.238636	0.243094	0.266667	0.230769	0.251366	0.262295	0.255556	0.218579	0.067039	0.121951	0	0	0.205714	0.045977	0	0.274286	0	0.034483	0.24	0	0.252747	0	0.248588	0.318681	0.322222		0.322222	0.331492	0.331492	0.365714	0.309392	0.335196	0.38674	0.340659	0.353591	0.220994	0.075	0.227273	0	0.284153	0.264151	0.157576	0	0.205128
Ig-like__29	3558	3646	89	0.285714	0.255556	0.310345	0.346369	0.258427	0.333333	0.232044	0.220994	0.202247	0.265193	0.180791	0.283951	0.26087	0.172414	0.16185	0.232558	0.251429	0.358382	0.208092	0.267442	0.231214	0.190476	0.3	0.293785	0.32	0.344444	0.359551	0.322222		0.290503	0.368715	0.323699	0.368715	0.271186	0.379888	0.322222	0.27933	0.256983	0.265823	0.218391	0.25	0.254144	0.216561	0.294479	0	0.12987
Ig-like__30	3653	3742	90	0.31694	0.320442	0.308571	0.322222	0.324022	0.309392	0.241758	0.318681	0.223464	0.307692	0.292135	0.245399	0.17284	0.228571	0.183908	0.196532	0.136364	0.218391	0	0	0.310345	0.201183	0.287293	0.280899	0.329545	0.38674	0.346369	0.331492	0.290503		0.355556	0.298851	0.266667	0.359551	0.388889	0.364641	0.322222	0.222222	0.226415	0.262857	0.20339	0.241758	0.177215	0.195122	0	0
Ig-like__31	3746	3835	90	0.327869	0.220994	0.274286	0.288889	0.268156	0.287293	0.197802	0.153846	0.268156	0.263736	0.191011	0.159509	0.222222	0.08	0.126437	0.046243	0.147727	0.310345	0.137931	0.242775	0.137931	0.142012	0.298343	0.235955	0.284091	0.364641	0.256983	0.331492	0.368715	0.355556		0.287356	0.3	0.303371	0.344444	0.320442	0.3	0.322222	0.201258	0.16	0.101695	0.241758	0.050633	0.243902	0	0.129032
Ig-like__32	3840	3923	84	0.225989	0.228571	0.284024	0.275862	0.254335	0.217143	0.272727	0.215909	0.219653	0.181818	0.244186	0.242038	0.166667	0	0.154762	0.263473	0.176471	0.178571	0.261905	0.287425	0.261905	0	0.228571	0.255814	0.235294	0.32	0.312139	0.365714	0.323699	0.298851	0.287356		0.252874	0.267442	0.275862	0.285714	0.310345	0.195402	0.287582	0.236686	0.222222	0.227273	0.276316	0	0	0.255034
Ig-like__33	3932	4021	90	0.349727	0.243094	0.32	0.3	0.256983	0.265193	0.208791	0.252747	0.256983	0.252747	0.224719	0.282209	0.098765	0.274286	0.149425	0.219653	0.102273	0.172414	0.172414	0.17341	0.241379	0.213018	0.331492	0.303371	0.318182	0.364641	0.335196	0.309392	0.368715	0.266667	0.3	0.252874		0.325843	0.333333	0.320442	0.366667	0.288889	0.226415	0.182857	0.271186	0.241758	0.177215	0.256098	0	0.283871
Ig-like__34	4028	4115	88	0.342541	0.223464	0.277457	0.292135	0.305085	0.301676	0.244444	0.233333	0.169492	0.122222	0.272727	0.198758	0.075	0.184971	0.255814	0.222222	0	0.209302	0.139535	0	0.267442	0.179641	0.256983	0.261364	0.241379	0.256983	0.293785	0.335196	0.271186	0.359551	0.303371	0.267442	0.325843		0.370787	0.368715	0.314607	0.213483	0.101911	0.254335	0.102857	0.288889	0	0.209877	0	0.104575
Ig-like__35	4124	4213	90	0.382514	0.232044	0.331429	0.333333	0.312849	0.276243	0.21978	0.274725	0.234637	0	0.224719	0.171779	0.222222	0	0.218391	0.231214	0.25	0.287356	0.241379	0.231214	0.321839	0.260355	0.276243	0.303371	0.318182	0.298343	0.368715	0.38674	0.379888	0.388889	0.344444	0.275862	0.333333	0.370787		0.353591	0.366667	0.244444	0.251572	0.16	0.271186	0.274725	0.164557	0.182927	0	0.154839
Ig-like__36	4220	4310	91	0.315217	0.263736	0.295455	0.287293	0.2	0.285714	0.262295	0.174863	0.2	0.120219	0.223464	0.146341	0.220859	0.181818	0.114286	0.091954	0.169492	0.16	0	0.195402	0.194286	0.129412	0.186813	0.312849	0.282486	0.296703	0.355556	0.340659	0.322222	0.364641	0.320442	0.285714	0.320442	0.368715	0.353591		0.40884	0.176796	0.175	0.159091	0.134831	0.251366	0.150943	0	0	0.141026
Ig-like__37	4317	4406	90	0.306011	0.254144	0.251429	0.211111	0.346369	0.232044	0.307692	0.241758	0.24581	0.131868	0.269663	0.233129	0.246914	0.182857	0.16092	0.196532	0	0.183908	0.206897	0.265896	0.229885	0.189349	0.254144	0.269663	0.318182	0.320442	0.368715	0.353591	0.27933	0.322222	0.3	0.310345	0.366667	0.314607	0.366667	0.40884		0.222222	0.125786	0.308571	0.180791	0.164835	0.189873	0	0	0.219355
Ig-like__38	4426	4515	90	0.306011	0.243094	0.251429	0.355556	0.268156	0.320442	0.241758	0.241758	0.290503	0.296703	0	0.245399	0.246914	0.262857	0.045977	0.196532	0	0	0.252874	0	0.298851	0.094675	0.320442	0.235955	0.284091	0.287293	0.189944	0.220994	0.256983	0.222222	0.322222	0.195402	0.288889	0.213483	0.244444	0.176796	0.222222		0.188679	0.217143	0	0.10989	0.101266	0.243902	0	0
Ig-like__39	4631	4699	69	0	0.175	0.246753	0.264151	0.202532	0.175	0.074534	0.149068	0.265823	0.136646	0.229299	0.323944	0.241135	0.207792	0.169935	0.263158	0.322581	0.222222	0.27451	0.223684	0.326797	0.202703	0.25	0.203822	0.270968	0.2375	0.265823	0.075	0.265823	0.226415	0.201258	0.287582	0.226415	0.101911	0.251572	0.175	0.125786	0.188679		0.207792	0.320513	0.26087	0	0.363636	0	0.283582
Ig-like__40	4714	4798	85	0.280899	0.261364	0.247059	0.24	0.275862	0.170455	0.124294	0.169492	0	0.20339	0.312139	0.240506	0.242038	0.270588	0.248521	0.238095	0.269006	0.236686	0.272189	0.214286	0.295858	0.195122	0.238636	0.254335	0.327485	0.193182	0.241379	0.227273	0.218391	0.262857	0.16	0.236686	0.182857	0.254335	0.16	0.159091	0.308571	0.217143	0.207792		0.186047	0.271186	0.235294	0	0	0.24
Ig-like__41	4804	4890	87	0.366667	0.292135	0.22093	0.305085	0.261364	0.179775	0	0.201117	0.215909	0	0.274286	0.3125	0.213836	0.197674	0.222222	0.235294	0.277457	0.269006	0.304094	0.294118	0.304094	0.361446	0.247191	0.308571	0.312139	0.337079	0.238636	0	0.25	0.20339	0.101695	0.222222	0.271186	0.102857	0.271186	0.134831	0.180791	0	0.320513	0.186047		0.346369	0.219355	0.285714	0	0.276316
Ig-like__42	5354	5445	92	0.345946	0.185792	0.214689	0.263736	0.198895	0.174863	0.173913	0.282609	0.176796	0	0.366667	0.278788	0.219512	0.20339	0.352273	0.205714	0.202247	0.272727	0.306818	0.217143	0.397727	0.163743	0.262295	0.255556	0.235955	0.163934	0.187845	0.284153	0.254144	0.241758	0.241758	0.227273	0.241758	0.288889	0.274725	0.251366	0.164835	0.10989	0.26087	0.271186	0.346369		0.2	0.192771	0	0.242038
Ig-like__43	5458	5525	68	0.173913	0.201258	0.235294	0.21519	0.165605	0.188679	0	0.1	0	0	0	0.113475	0.2	0.261438	0.223684	0.211921	0.181818	0.105263	0.171053	0	0.236842	0.231293	0.176101	0.205128	0	0	0.216561	0.264151	0.216561	0.177215	0.050633	0.276316	0.177215	0	0.164557	0.150943	0.189873	0.101266	0	0.235294	0.219355	0.2		0.225352	0	0
Ig-like__44	5546	5619	74	0.167665	0.230303	0	0.182927	0.208589	0.218182	0.120482	0	0	0.168675	0.197531	0.272109	0	0.251572	0.151899	0.292994	0.275	0.21519	0.240506	0.267516	0.265823	0.130719	0	0.222222	0.2875	0.254545	0.171779	0.157576	0.294479	0.195122	0.243902	0	0.256098	0.209877	0.182927	0	0	0.243902	0.363636	0	0.285714	0.192771	0.225352		0	0.18705
Ig-like__45	5727	5733	7	0	0	0	0	0	0	0	0	0	0	0	0	0	0.130435	0	0	0	0	0	0	0	0	0	0	0	0	0	0	0	0	0	0	0	0	0	0	0	0	0	0	0	0	0	0		0
Ig-like__46	5812	5876	65	0.164557	0.179487	0.253333	0.064516	0.064935	0	0.11465	0	0.194805	0.242038	0.300654	0.289855	0.233577	0.226667	0.268456	0.243243	0.291391	0.255034	0.241611	0.22973	0.228188	0.194444	0.192308	0.261438	0	0.141026	0.194805	0.205128	0.12987	0	0.129032	0.255034	0.283871	0.104575	0.154839	0.141026	0.219355	0	0.283582	0.24	0.276316	0.242038	0	0.18705	0
Ig-like__47	5916	5976	61	0.25974	0.197368	0.246575	0	0.2	0.078947	0	0.20915	0.093333	0	0.214765	0.298507	0.255639	0.219178	0.248276	0.236111	0.190476	0.193103	0.275862	0.222222	0.275862	0.242857	0.171053	0.187919	0.217687	0.171053	0.24	0.276316	0.213333	0.18543	0.145695	0.275862	0.172185	0.187919	0.211921	0.236842	0.225166	0.225166	0.307692	0.219178	0.283784	0.183007	0.263566	0.296296	0	0.253968
Ig-like__48	5989	6072	84	0.158192	0.091429	0.047337	0.091954	0.115607	0.228571	0.125	0	0.277457	0.056818	0.151163	0.229299	0.166667	0	0.27381	0	0.270588	0.166667	0.25	0.215569	0.297619	0	0.228571	0	0.082353	0.228571	0.092486	0.022857	0.138728	0.149425	0.229885	0.178571	0.137931	0	0	0.114286	0.195402	0	0.235294	0.224852	0.19883	0.215909	0	0.265823	0	0.268456
Ig-like__49	6079	6161	83	0.261364	0.195402	0.214286	0.150289	0.244186	0.218391	0.285714	0.217143	0.186047	0.182857	0.374269	0.320513	0.283871	0.333333	0.323353	0.337349	0.307692	0.227545	0.323353	0.337349	0.359281	0.259259	0	0.245614	0.260355	0.229885	0	0	0.244186	0.034682	0	0	0.265896	0.116959	0.277457	0.241379	0.242775	0.231214	0.263158	0.238095	0.270588	0.262857	0.211921	0.305732	0	0.310811
Ig-like__50	6167	6250	84	0	0.148571	0	0.057471	0	0	0.125	0	0.254335	0.159091	0.383721	0.305732	0.230769	0.189349	0.321429	0.287425	0.317647	0.297619	0.297619	0.239521	0.297619	0.159509	0.217143	0.186047	0	0.16	0	0.251429	0.219653	0.126437	0	0.178571	0.241379	0.139535	0.287356	0.08	0.149425	0	0.222222	0.260355	0.210526	0.318182	0.197368	0.227848	0.131868	0.510067
Ig-like__51	6255	6339	85	0.269663	0.261364	0.282353	0.228571	0.252874	0.136364	0.237288	0.282486	0	0	0.265896	0.253165	0.267516	0.282353	0.295858	0.285714	0	0.236686	0.272189	0.238095	0.35503	0.207317	0.272727	0.196532	0.152047	0.25	0.252874	0.318182	0.172414	0.274286	0.194286	0.248521	0.194286	0.323699	0.262857	0.238636	0.274286	0.274286	0.246753	0.317647	0.209302	0.293785	0.261438	0.251572	0	0.266667
Ig-like__52	6345	6428	84	0	0.171429	0.035503	0.08046	0	0.091429	0	0	0.208092	0	0.174419	0.254777	0.192308	0.213018	0.321429	0.275449	0.270588	0.214286	0.297619	0.251497	0.285714	0	0	0	0	0	0.057803	0	0	0.022989	0.103448	0.130952	0	0	0.183908	0.125714	0	0.022989	0	0.201183	0.222222	0.181818	0.092105	0.075949	0	0.33557
Ig-like__53	6436	6507	72	0.254545	0	0.356688	0	0.198758	0.233129	0	0.158537	0.298137	0.207317	0.275	0.289655	0.236111	0.254777	0.282051	0.270968	0.278481	0.25641	0.217949	0.283871	0.282051	0.198675	0.245399	0.1625	0.253165	0.196319	0.21118	0.233129	0.248447	0.246914	0.209877	0.24359	0.283951	0.2375	0.271605	0.110429	0.185185	0.17284	0.326241	0.242038	0.301887	0.256098	0.3	0.260274	0.151899	0.423358
Ig-like__54	6523	6607	85	0.235955	0.227273	0.270588	0.228571	0.149425	0.159091	0.259887	0.20339	0.229885	0.225989	0.323699	0.35443	0.292994	0.305882	0.331361	0.357143	0.315789	0.343195	0.319527	0.345238	0.366864	0.292683	0.261364	0.219653	0.315789	0.261364	0.252874	0.261364	0.264368	0.308571	0.137143	0.248521	0.217143	0.115607	0.205714	0.25	0.251429	0	0.298701	0.317647	0.325581	0.293785	0	0.301887	0	0.4
Ig-like__55	6631	6695	65	0.050633	0.166667	0.16	0.180645	0.181818	0.128205	0	0.076433	0	0.063694	0.27451	0.188406	0.218978	0.213333	0.308725	0.22973	0.198675	0	0.268456	0.283784	0.241611	0.263889	0.24359	0	0.264901	0.24359	0.168831	0.179487	0.194805	0.167742	0.077419	0.161074	0.245161	0.20915	0.193548	0	0.167742	0.180645	0	0.2	0.171053	0.191083	0.06015	0	0	0.169231
Ig-like__56	6701	6784	84	0.248588	0.205714	0.366864	0.195402	0.231214	0.217143	0.090909	0.193182	0.150289	0.147727	0.337209	0.318471	0.269231	0.272189	0.285714	0.347305	0	0.261905	0.285714	0.215569	0.297619	0.220859	0.228571	0.255814	0.329412	0.251429	0.277457	0.285714	0.208092	0.183908	0.252874	0.25	0.206897	0.302326	0.264368	0.171429	0.218391	0.218391	0.20915	0.343195	0.280702	0.340909	0.236842	0.329114	0	0.241611
Ig-like__57	6790	6790	1	0	0	0	0	0	0	0	0	0	0	0	0	0	0	0	0	0	0	0	0	0	0	0	0	0	0	0	0	0	0	0	0	0	0	0	0	0	0	0	0	0	0	0	0	0	0
Ig-like__58	6883	6966	84	0	0.228571	0.213018	0.287356	0.312139	0.217143	0.079545	0	0.219653	0.261364	0.244186	0.267516	0.282051	0.295858	0	0.227545	0.294118	0	0.345238	0.383234	0.214286	0.269939	0.285714	0.267442	0.376471	0.262857	0.17341	0	0.265896	0.275862	0.218391	0.25	0	0.244186	0.057471	0.16	0.206897	0.218391	0.300654	0.319527	0.304094	0.238636	0.263158	0.227848	0	0.295302
Ig-like__59	6972	7055	84	0.225989	0.274286	0.201183	0.195402	0.277457	0.171429	0.25	0.170455	0.277457	0.215909	0.244186	0.254777	0.307692	0.260355	0.321429	0.275449	0.2	0.297619	0.321429	0.39521	0.333333	0.282209	0.182857	0.27907	0.270588	0.08	0.196532	0.194286	0.289017	0.275862	0.057471	0.142857	0.149425	0.05814	0.264368	0.148571	0.218391	0.264368	0.235294	0.307692	0.280702	0.227273	0.236842	0.303797	0	0.174497
Ig-like__60	7062	7131	70	0.233129	0.198758	0.245161	0.225	0	0.136646	0	0	0.251572	0.259259	0.35443	0.335664	0.28169	0.296774	0.337662	0.313725	0.333333	0.220779	0.246753	0.300654	0.272727	0.201342	0.248447	0.240506	0.269231	0.223602	0.213836	0.248447	0.201258	0.225	0.1875	0.233766	0.2125	0.189873	0.2375	0.149068	0.225	0.2375	0.302158	0.374194	0.305732	0.283951	0.318841	0.319444	0	0.37037
Ig-like__61	7150	7232	83	0	0.183908	0.142857	0.16185	0	0.149425	0.148571	0.102857	0	0.194286	0.19883	0.269231	0.180645	0.25	0.335329	0.26506	0.213018	0.383234	0.215569	0.240964	0.239521	0.197531	0.126437	0.19883	0.177515	0.137931	0.209302	0.08046	0.209302	0.150289	0.17341	0.131737	0.104046	0.210526	0.127168	0.091954	0.104046	0.184971	0.223684	0.22619	0.235294	0.24	0.238411	0.242038	0	0.297297
Ig-like__62	7246	7323	78	0.163743	0.142012	0.159509	0.238095	0.071856	0	0	0.058824	0.167665	0	0	0.13245	0	0.110429	0.098765	0.198758	0.060976	0.098765	0	0	0	0.11465	0.08284	0	0.207317	0	0	0.177515	0.023952	0.119048	0	0	0.178571	0.192771	0.02381	0.153846	0.119048	0.202381	0.176871	0.171779	0.145455	0.094118	0.027397	0.184211	0	0
Ig-like__63	7647	7721	75	0.202381	0.204819	0.2875	0.230303	0.207317	0.204819	0.239521	0	0.219512	0	0	0.121622	0.095238	0.1625	0.100629	0	0.124224	0.100629	0.113208	0.088608	0.176101	0.090909	0.180723	0.171779	0	0.192771	0.146341	0	0.182927	0.157576	0.169697	0.226415	0.206061	0.220859	0.254545	0.168675	0.169697	0.218182	0.166667	0.1875	0.111111	0.083832	0.167832	0	0	0.057143
Ig-like__64	7937	8017	81	0.252874	0.267442	0.228916	0.222222	0.270588	0.232558	0.33526	0.138728	0.223529	0.242775	0.047337	0.181818	0.222222	0.180723	0.09697	0.195122	0.107784	0.072727	0	0	0.206061	0.2	0.27907	0.177515	0.191617	0.244186	0.211765	0.232558	0.270588	0.19883	0.187135	0.278788	0.233918	0.177515	0.245614	0.162791	0.233918	0.25731	0.16	0.156627	0.154762	0.115607	0.228188	0.167742	0	0
name	fs	ls	n	Fibro_____1	Fibro_____2	Fibro_____3	Fibro_____4	Fibro_____5	Fibro_____6
				91	93	94	86	89	53
Ig-like___1	6	98	93	0	0	0	0	0	0
Ig-like___2	103	193	91	0.098901	0.152174	0.064865	0.045198	0.133333	0.055556
Ig-like___3	695	779	85	0	0.022472	0	0	0	0
Ig-like___4	827	916	90	0.110497	0.185792	0.152174	0.079545	0.055866	0.055944
Ig-like___5	1037	1125	89	0.066667	0.032967	0.098361	0	0.11236	0
Ig-like___6	1185	1275	91	0.054945	0	0.054054	0	0	0.027778
Ig-like___7	1284	1375	92	0.054645	0	0.107527	0	0.066298	0.027586
Ig-like___8	1431	1522	92	0	0.043243	0.043011	0	0.044199	0.110345
Ig-like___9	1569	1657	89	0.077778	0	0	0.034286	0.033708	0.056338
Ig-like__10	1805	1896	92	0.032787	0	0	0.078652	0.055249	0.041379
Ig-like__11	1902	1989	88	0.044693	0	0	0	0.045198	0
Ig-like__12	1995	2067	73	0.085366	0	0	0.062893	0.049383	0
Ig-like__13	2082	2153	72	0.06135	0	0	0.050633	0.149068	0
Ig-like__14	2173	2257	85	0.125	0	0.044693	0.093567	0.091954	0.057971
Ig-like__15	2261	2344	84	0	0.056497	0	0.188235	0.080925	0
Ig-like__16	2349	2431	83	0.114943	0	0.022599	0	0.05814	0
Ig-like__17	2435	2520	86	0.079096	0.067039	0.033333	0	0.125714	0
Ig-like__18	2523	2606	84	0	0.022599	0	0	0	0
Ig-like__19	2610	2693	84	0	0.135593	0.033708	0	0	0
Ig-like__20	2698	2780	83	0.068966	0	0.056497	0	0.046512	0
Ig-like__21	2786	2869	84	0	0	0.11236	0	0	0
Ig-like__22	2882	2960	79	0.188235	0.034884	0.034682	0.036364	0	0.090909
Ig-like__23	2966	3056	91	0	0	0.183784	0.101695	0.033333	0.041667
Ig-like__24	3072	3159	88	0.044693	0	0.054945	0.045977	0	0
Ig-like__25	3187	3272	86	0.056497	0	0	0	0	0
Ig-like__26	3276	3366	91	0	0.032609	0	0.169492	0	0.041667
Ig-like__27	3370	3458	89	0	0.054945	0.131148	0.08	0.033708	0
Ig-like__28	3463	3553	91	0.043956	0.097826	0	0.022599	0	0
Ig-like__29	3558	3646	89	0	0.087912	0.163934	0	0.033708	0
Ig-like__30	3653	3742	90	0.099448	0.142077	0.141304	0	0.044693	0
Ig-like__31	3746	3835	90	0.022099	0	0.065217	0	0.055866	0
Ig-like__32	3840	3923	84	0.057143	0.158192	0.033708	0.047059	0.046243	0
Ig-like__33	3932	4021	90	0	0	0	0	0	0
Ig-like__34	4028	4115	88	0.044693	0.132597	0	0	0	0.085106
Ig-like__35	4124	4213	90	0.055249	0.043716	0	0.056818	0	0.13986
Ig-like__36	4220	4310	91	0	0	0	0	0	0
Ig-like__37	4317	4406	90	0	0.10929	0.141304	0	0.111732	0
Ig-like__38	4426	4515	90	0	0	0	0	0.067039	0
Ig-like__39	4631	4699	69	0	0	0.04908	0	0	0
Ig-like__40	4714	4798	85	0	0	0	0.035088	0.034483	0
Ig-like__41	4804	4890	87	0.044944	0	0	0.057803	0.045455	0
Ig-like__42	5354	5445	92	0	0.021622	0.032258	0	0	0
Ig-like__43	5458	5525	68	0.075472	0	0	0	0	0
Ig-like__44	5546	5619	74	0	0	0	0	0	0
Ig-like__45	5727	5733	7	0	0	0	0	0	0
Ig-like__46	5812	5876	65	0	0	0	0	0.116883	0
Ig-like__47	5916	5976	61	0	0	0	0	0	0
Ig-like__48	5989	6072	84	0.08	0	0	0	0	0
Ig-like__49	6079	6161	83	0	0.045455	0	0	0	0
Ig-like__50	6167	6250	84	0	0	0	0	0	0.058394
Ig-like__51	6255	6339	85	0.102273	0.022472	0	0	0.08046	0
Ig-like__52	6345	6428	84	0.068571	0	0	0	0.080925	0
Ig-like__53	6436	6507	72	0.07362	0.145455	0.108434	0	0.037267	0
Ig-like__54	6523	6607	85	0	0	0	0.046784	0.068966	0.043478
Ig-like__55	6631	6695	65	0	0	0.025157	0.039735	0	0
Ig-like__56	6701	6784	84	0	0	0	0	0	0
Ig-like__57	6790	6790	1	0	0	0	0	0	0
Ig-like__58	6883	6966	84	0.057143	0	0	0	0	0.072993
Ig-like__59	6972	7055	84	0	0.067797	0	0	0.023121	0
Ig-like__60	7062	7131	70	0.037267	0.04908	0.060976	0.051282	0	0
Ig-like__61	7150	7232	83	0	0	0	0.071006	0	0.102941
Ig-like__62	7246	7323	78	0.08284	0.05848	0.069767	0.02439	0	0
Ig-like__63	7647	7721	75	0	0.071429	0.047337	0	0	0
Ig-like__64	7937	8017	81	0	0.126437	0	0.107784	0	0.149254
name	fs	ls	n	predic_Ig_0
				51
Ig-like___1	6	98	93	0
Ig-like___2	103	193	91	0
Ig-like___3	695	779	85	0.088235
Ig-like___4	827	916	90	0.099291
Ig-like___5	1037	1125	89	0
Ig-like___6	1185	1275	91	0
Ig-like___7	1284	1375	92	0
Ig-like___8	1431	1522	92	0
Ig-like___9	1569	1657	89	0
Ig-like__10	1805	1896	92	0
Ig-like__11	1902	1989	88	0
Ig-like__12	1995	2067	73	0
Ig-like__13	2082	2153	72	0
Ig-like__14	2173	2257	85	0
Ig-like__15	2261	2344	84	0
Ig-like__16	2349	2431	83	0.104478
Ig-like__17	2435	2520	86	0
Ig-like__18	2523	2606	84	0
Ig-like__19	2610	2693	84	0
Ig-like__20	2698	2780	83	0
Ig-like__21	2786	2869	84	0.059259
Ig-like__22	2882	2960	79	0
Ig-like__23	2966	3056	91	0
Ig-like__24	3072	3159	88	0
Ig-like__25	3187	3272	86	0.029197
Ig-like__26	3276	3366	91	0
Ig-like__27	3370	3458	89	0.028571
Ig-like__28	3463	3553	91	0
Ig-like__29	3558	3646	89	0
Ig-like__30	3653	3742	90	0
Ig-like__31	3746	3835	90	0.141844
Ig-like__32	3840	3923	84	0.02963
Ig-like__33	3932	4021	90	0
Ig-like__34	4028	4115	88	0
Ig-like__35	4124	4213	90	0
Ig-like__36	4220	4310	91	0
Ig-like__37	4317	4406	90	0
Ig-like__38	4426	4515	90	0
Ig-like__39	4631	4699	69	0
Ig-like__40	4714	4798	85	0.058824
Ig-like__41	4804	4890	87	0.028986
Ig-like__42	5354	5445	92	0
Ig-like__43	5458	5525	68	0
Ig-like__44	5546	5619	74	0
Ig-like__45	5727	5733	7	0
Ig-like__46	5812	5876	65	0
Ig-like__47	5916	5976	61	0
Ig-like__48	5989	6072	84	0.074074
Ig-like__49	6079	6161	83	0
Ig-like__50	6167	6250	84	0
Ig-like__51	6255	6339	85	0
Ig-like__52	6345	6428	84	0
Ig-like__53	6436	6507	72	0
Ig-like__54	6523	6607	85	0.058824
Ig-like__55	6631	6695	65	0
Ig-like__56	6701	6784	84	0.044444
Ig-like__57	6790	6790	1	0
Ig-like__58	6883	6966	84	0
Ig-like__59	6972	7055	84	0
Ig-like__60	7062	7131	70	0
Ig-like__61	7150	7232	83	0.074627
Ig-like__62	7246	7323	78	0
Ig-like__63	7647	7721	75	0
Ig-like__64	7937	8017	81	0.060606
name	fs	ls	n	THB_______0
				31
Ig-like___1	6	98	93	0
Ig-like___2	103	193	91	0
Ig-like___3	695	779	85	0
Ig-like___4	827	916	90	0
Ig-like___5	1037	1125	89	0
Ig-like___6	1185	1275	91	0
Ig-like___7	1284	1375	92	0.113821
Ig-like___8	1431	1522	92	0
Ig-like___9	1569	1657	89	0
Ig-like__10	1805	1896	92	0
Ig-like__11	1902	1989	88	0.084034
Ig-like__12	1995	2067	73	0
Ig-like__13	2082	2153	72	0
Ig-like__14	2173	2257	85	0
Ig-like__15	2261	2344	84	0.086957
Ig-like__16	2349	2431	83	0
Ig-like__17	2435	2520	86	0
Ig-like__18	2523	2606	84	0.104348
Ig-like__19	2610	2693	84	0
Ig-like__20	2698	2780	83	0
Ig-like__21	2786	2869	84	0
Ig-like__22	2882	2960	79	0
Ig-like__23	2966	3056	91	0
Ig-like__24	3072	3159	88	0
Ig-like__25	3187	3272	86	0
Ig-like__26	3276	3366	91	0
Ig-like__27	3370	3458	89	0
Ig-like__28	3463	3553	91	0
Ig-like__29	3558	3646	89	0
Ig-like__30	3653	3742	90	0
Ig-like__31	3746	3835	90	0
Ig-like__32	3840	3923	84	0
Ig-like__33	3932	4021	90	0
Ig-like__34	4028	4115	88	0.084034
Ig-like__35	4124	4213	90	0
Ig-like__36	4220	4310	91	0
Ig-like__37	4317	4406	90	0
Ig-like__38	4426	4515	90	0
Ig-like__39	4631	4699	69	0
Ig-like__40	4714	4798	85	0
Ig-like__41	4804	4890	87	0
Ig-like__42	5354	5445	92	0
Ig-like__43	5458	5525	68	0
Ig-like__44	5546	5619	74	0
Ig-like__45	5727	5733	7	0
Ig-like__46	5812	5876	65	0
Ig-like__47	5916	5976	61	0
Ig-like__48	5989	6072	84	0
Ig-like__49	6079	6161	83	0
Ig-like__50	6167	6250	84	0
Ig-like__51	6255	6339	85	0
Ig-like__52	6345	6428	84	0
Ig-like__53	6436	6507	72	0
Ig-like__54	6523	6607	85	0
Ig-like__55	6631	6695	65	0.145833
Ig-like__56	6701	6784	84	0
Ig-like__57	6790	6790	1	0
Ig-like__58	6883	6966	84	0
Ig-like__59	6972	7055	84	0
Ig-like__60	7062	7131	70	0
Ig-like__61	7150	7232	83	0
Ig-like__62	7246	7323	78	0
Ig-like__63	7647	7721	75	0
Ig-like__64	7937	8017	81	0
name	fs	ls	n	Titin_Z___0
				40
Ig-like___1	6	98	93	0
Ig-like___2	103	193	91	0.076336
Ig-like___3	695	779	85	0
Ig-like___4	827	916	90	0
Ig-like___5	1037	1125	89	0
Ig-like___6	1185	1275	91	0
Ig-like___7	1284	1375	92	0
Ig-like___8	1431	1522	92	0
Ig-like___9	1569	1657	89	0
Ig-like__10	1805	1896	92	0
Ig-like__11	1902	1989	88	0
Ig-like__12	1995	2067	73	0
Ig-like__13	2082	2153	72	0
Ig-like__14	2173	2257	85	0
Ig-like__15	2261	2344	84	0
Ig-like__16	2349	2431	83	0
Ig-like__17	2435	2520	86	0
Ig-like__18	2523	2606	84	0
Ig-like__19	2610	2693	84	0
Ig-like__20	2698	2780	83	0
Ig-like__21	2786	2869	84	0
Ig-like__22	2882	2960	79	0
Ig-like__23	2966	3056	91	0
Ig-like__24	3072	3159	88	0
Ig-like__25	3187	3272	86	0
Ig-like__26	3276	3366	91	0
Ig-like__27	3370	3458	89	0
Ig-like__28	3463	3553	91	0
Ig-like__29	3558	3646	89	0
Ig-like__30	3653	3742	90	0
Ig-like__31	3746	3835	90	0
Ig-like__32	3840	3923	84	0
Ig-like__33	3932	4021	90	0
Ig-like__34	4028	4115	88	0
Ig-like__35	4124	4213	90	0
Ig-like__36	4220	4310	91	0
Ig-like__37	4317	4406	90	0
Ig-like__38	4426	4515	90	0.107692
Ig-like__39	4631	4699	69	0
Ig-like__40	4714	4798	85	0
Ig-like__41	4804	4890	87	0
Ig-like__42	5354	5445	92	0
Ig-like__43	5458	5525	68	0
Ig-like__44	5546	5619	74	0
Ig-like__45	5727	5733	7	0
Ig-like__46	5812	5876	65	0
Ig-like__47	5916	5976	61	0
Ig-like__48	5989	6072	84	0
Ig-like__49	6079	6161	83	0
Ig-like__50	6167	6250	84	0
Ig-like__51	6255	6339	85	0
Ig-like__52	6345	6428	84	0
Ig-like__53	6436	6507	72	0.035714
Ig-like__54	6523	6607	85	0.08
Ig-like__55	6631	6695	65	0.152381
Ig-like__56	6701	6784	84	0
Ig-like__57	6790	6790	1	0
Ig-like__58	6883	6966	84	0
Ig-like__59	6972	7055	84	0
Ig-like__60	7062	7131	70	0
Ig-like__61	7150	7232	83	0
Ig-like__62	7246	7323	78	0
Ig-like__63	7647	7721	75	0
Ig-like__64	7937	8017	81	0.082645
name	fs	ls	n	none_____10	none______0	none______1	none______2	none______3	none______4	none______5	none______6	none______7	none______8	none______9
				107	50	56	254	47	120	59	55	147	53	198
Ig-like___1	6	98	93	0	0	0	0.034582	0.157143	0	0	0	0.058333	0	0
Ig-like___2	103	193	91	0	0	0	0	0.057971	0	0	0.068493	0	0	0
Ig-like___3	695	779	85	0	0	0	0.053097	0.060606	0	0	0	0	0.202899	0
Ig-like___4	827	916	90	0.091371	0	0	0.046512	0	0	0	0	0	0	0
Ig-like___5	1037	1125	89	0	0	0	0.029155	0	0	0	0	0.025424	0	0.020906
Ig-like___6	1185	1275	91	0.242424	0	0	0	0	0	0	0	0	0	0
Ig-like___7	1284	1375	92	0	0	0	0.075145	0	0	0	0	0	0	0
Ig-like___8	1431	1522	92	0	0	0	0	0	0.04717	0	0	0	0	0.027586
Ig-like___9	1569	1657	89	0.265306	0	0	0	0.058824	0	0	0.041667	0	0	0
Ig-like__10	1805	1896	92	0	0.042254	0	0.028902	0	0	0	0	0.058577	0	0.034483
Ig-like__11	1902	1989	88	0	0	0	0.023392	0	0	0	0	0	0	0
Ig-like__12	1995	2067	73	0.266667	0	0	0.030581	0	0	0	0	0	0	0.0369
Ig-like__13	2082	2153	72	0.122905	0	0	0.03681	0	0	0	0	0	0	0
Ig-like__14	2173	2257	85	0.177083	0	0	0.053097	0	0	0.055556	0	0	0	0
Ig-like__15	2261	2344	84	0.26178	0	0	0.04142	0	0	0	0	0	0	0
Ig-like__16	2349	2431	83	0.273684	0	0	0	0	0	0.042254	0.130435	0	0	0
Ig-like__17	2435	2520	86	0.041451	0.029412	0	0.058824	0	0	0	0	0.042918	0	0
Ig-like__18	2523	2606	84	0.188482	0	0	0.023669	0	0	0	0.071942	0.04329	0	0.028369
Ig-like__19	2610	2693	84	0.219895	0	0	0.076923	0	0	0	0	0	0.072993	0.035461
Ig-like__20	2698	2780	83	0.231579	0	0	0	0	0	0	0	0.069565	0	0.021352
Ig-like__21	2786	2869	84	0.272251	0	0	0	0	0	0	0.071942	0.069264	0.116788	0.028369
Ig-like__22	2882	2960	79	0.096774	0	0	0	0.063492	0.050251	0	0	0	0.075758	0
Ig-like__23	2966	3056	91	0	0	0	0	0.057971	0.037915	0	0	0	0	0.069204
Ig-like__24	3072	3159	88	0.215385	0	0	0	0	0	0.040816	0	0	0	0
Ig-like__25	3187	3272	86	0.217617	0	0	0	0	0	0	0.099291	0	0	0.035211
Ig-like__26	3276	3366	91	0	0	0.081633	0.034783	0	0	0	0	0.05042	0	0.041522
Ig-like__27	3370	3458	89	0.102041	0	0	0.046647	0	0	0	0	0	0	0.034843
Ig-like__28	3463	3553	91	0.232323	0	0	0.046377	0	0.037915	0	0	0	0.069444	0
Ig-like__29	3558	3646	89	0.081633	0	0	0.023324	0	0	0	0.111111	0	0	0.041812
Ig-like__30	3653	3742	90	0	0	0.054795	0	0	0	0	0	0.033755	0	0.048611
Ig-like__31	3746	3835	90	0.233503	0	0	0	0	0	0	0	0	0	0
Ig-like__32	3840	3923	84	0.136126	0	0	0	0	0	0.055944	0	0	0	0.028369
Ig-like__33	3932	4021	90	0.213198	0	0	0.023256	0	0	0	0	0	0	0
Ig-like__34	4028	4115	88	0	0	0	0	0	0	0	0	0	0	0
Ig-like__35	4124	4213	90	0.060914	0	0	0	0	0.095238	0.053691	0	0	0	0.020833
Ig-like__36	4220	4310	91	0.050505	0	0.081633	0	0	0	0	0	0	0	0
Ig-like__37	4317	4406	90	0.203046	0	0	0	0	0	0	0	0	0	0
Ig-like__38	4426	4515	90	0.091371	0	0	0	0	0	0	0	0	0	0.0625
Ig-like__39	4631	4699	69	0	0	0	0.024768	0	0	0	0	0	0	0
Ig-like__40	4714	4798	85	0.1875	0	0.056738	0	0.045455	0	0	0	0	0	0.028269
Ig-like__41	4804	4890	87	0.195876	0	0	0	0	0	0	0	0	0	0
Ig-like__42	5354	5445	92	0.221106	0	0	0.057803	0	0	0.039735	0	0.025105	0	0.027586
Ig-like__43	5458	5525	68	0.114286	0	0	0.031056	0	0	0	0	0	0	0
Ig-like__44	5546	5619	74	0.243094	0	0.061538	0.02439	0.066116	0.092784	0.06015	0.093023	0.063348	0	0
Ig-like__45	5727	5733	7	0.087719	0	0	0	0	0	0	0	0	0	0
Ig-like__46	5812	5876	65	0.267442	0	0	0.037618	0	0	0	0.033333	0	0	0.106464
Ig-like__47	5916	5976	61	0.166667	0	0	0.031746	0	0	0	0	0	0	0
Ig-like__48	5989	6072	84	0.439791	0	0	0.017751	0	0	0.06993	0.057554	0	0	0
Ig-like__49	6079	6161	83	0.284211	0	0	0.10089	0	0	0.028169	0	0.095652	0	0.05694
Ig-like__50	6167	6250	84	0.272251	0	0	0.035503	0	0.078431	0	0	0	0	0.035461
Ig-like__51	6255	6339	85	0.28125	0	0	0	0	0	0	0	0.051724	0	0
Ig-like__52	6345	6428	84	0.52356	0	0	0.029586	0	0	0	0.100719	0	0	0
Ig-like__53	6436	6507	72	0.402235	0	0	0	0.201681	0	0	0	0.054795	0	0.022222
Ig-like__54	6523	6607	85	0.302083	0.074074	0	0	0.030303	0	0	0	0	0	0.035336
Ig-like__55	6631	6695	65	0	0	0	0	0	0	0	0	0	0	0
Ig-like__56	6701	6784	84	0.26178	0	0	0	0	0	0	0	0	0	0.028369
Ig-like__57	6790	6790	1	0	0	0	0	0	0	0	0	0	0	0
Ig-like__58	6883	6966	84	0.115183	0	0	0	0	0.068627	0	0	0	0	0
Ig-like__59	6972	7055	84	0.17801	0	0	0	0	0	0	0	0.034632	0	0
Ig-like__60	7062	7131	70	0.158192	0	0	0	0	0	0	0	0	0	0
Ig-like__61	7150	7232	83	0.210526	0	0	0	0	0.08867	0	0	0.052174	0	0.02847
Ig-like__62	7246	7323	78	0	0	0	0.054217	0	0	0	0	0.026667	0	0
Ig-like__63	7647	7721	75	0.065934	0	0	0.024316	0	0	0	0	0	0	0
Ig-like__64	7937	8017	81	0.106383	0	0	0	0	0.049751	0	0.044118	0.052632	0	0.078853
name	fs	ls	n	Fibro_____1	Fibro_____2	Fibro_____3	Fibro_____4	Fibro_____5	Fibro_____6
				91	93	94	86	89	53
Fibro_____1	7327	7417	91		0.402174	0.356757	0.451977	0.3	0.277778
Fibro_____2	7428	7520	93	0.402174		0.299465	0.391061	0.417582	0.30137
Fibro_____3	7529	7622	94	0.356757	0.299465		0.388889	0.382514	0.231293
Fibro_____4	7725	7810	86	0.451977	0.391061	0.388889		0.308571	0.258993
Fibro_____5	7825	7913	89	0.3	0.417582	0.382514	0.308571		0.239437
Fibro_____6	8021	8073	53	0.277778	0.30137	0.231293	0.258993	0.239437
name	fs	ls	n	predic_Ig_0
				51
Fibro_____1	7327	7417	91	0.098592
Fibro_____2	7428	7520	93	0
Fibro_____3	7529	7622	94	0
Fibro_____4	7725	7810	86	0
Fibro_____5	7825	7913	89	0.157143
Fibro_____6	8021	8073	53	0
name	fs	ls	n	THB_______0
				31
Fibro_____1	7327	7417	91	0
Fibro_____2	7428	7520	93	0
Fibro_____3	7529	7622	94	0
Fibro_____4	7725	7810	86	0
Fibro_____5	7825	7913	89	0
Fibro_____6	8021	8073	53	0
name	fs	ls	n	Titin_Z___0
				40
Fibro_____1	7327	7417	91	0
Fibro_____2	7428	7520	93	0.045113
Fibro_____3	7529	7622	94	0
Fibro_____4	7725	7810	86	0
Fibro_____5	7825	7913	89	0
Fibro_____6	8021	8073	53	0
name	fs	ls	n	none_____10	none______0	none______1	none______2	none______3	none______4	none______5	none______6	none______7	none______8	none______9
				107	50	56	254	47	120	59	55	147	53	198
Fibro_____1	7327	7417	91	0.040404	0	0	0.069565	0.101449	0.047393	0	0	0.042017	0	0.013841
Fibro_____2	7428	7520	93	0.04	0	0	0	0	0	0	0.067568	0.066667	0	0
Fibro_____3	7529	7622	94	0	0	0	0	0	0	0	0.026846	0	0	0.013699
Fibro_____4	7725	7810	86	0	0	0	0.052941	0	0.019417	0	0	0.034335	0	0.042254
Fibro_____5	7825	7913	89	0.040816	0	0	0.040816	0	0.028708	0	0	0.067797	0	0.034843
Fibro_____6	8021	8073	53	0	0	0	0.026059	0	0	0	0	0.06	0	0.031873
name	fs	ls	n	predic_Ig_0
				51
predic_Ig_0	5089	5139	51
name	fs	ls	n	THB_______0
				31
predic_Ig_0	5089	5139	51	0
name	fs	ls	n	Titin_Z___0
				40
predic_Ig_0	5089	5139	51	0.131868
name	fs	ls	n	none_____10	none______0	none______1	none______2	none______3	none______4	none______5	none______6	none______7	none______8	none______9
				107	50	56	254	47	120	59	55	147	53	198
predic_Ig_0	5089	5139	51	0	0	0	0	0	0.035088	0	0.037736	0.040404	0	0.048193
name	fs	ls	n	THB_______0
				31
THB_______0	4547	4577	31
name	fs	ls	n	Titin_Z___0
				40
THB_______0	4547	4577	31	0
name	fs	ls	n	none_____10	none______0	none______1	none______2	none______3	none______4	none______5	none______6	none______7	none______8	none______9
				107	50	56	254	47	120	59	55	147	53	198
THB_______0	4547	4577	31	0	0	0	0	0	0	0	0	0	0	0
name	fs	ls	n	Titin_Z___0
				40
Titin_Z___0	401	440	40
name	fs	ls	n	none_____10	none______0	none______1	none______2	none______3	none______4	none______5	none______6	none______7	none______8	none______9
				107	50	56	254	47	120	59	55	147	53	198
Titin_Z___0	401	440	40	0	0	0	0.034014	0	0	0	0.105263	0.053476	0	0.092437
name	fs	ls	n	none_____10	none______0	none______1	none______2	none______3	none______4	none______5	none______6	none______7	none______8	none______9
				107	50	56	254	47	120	59	55	147	53	198
none_____10	5620	5726	107		0.089172	0.08589	0.038781	0	0.044053	0	0	0	0	0.065574
none______0	194	243	50	0.089172		0	0.065789	0	0	0	0	0	0.097087	0
none______1	345	400	56	0.08589	0		0	0.291262	0	0	0	0.029557	0	0.055118
none______2	441	694	254	0.038781	0.065789	0		0	0.058824	0	0.019417	0.084788	0	0.026549
none______3	780	826	47	0	0	0	0		0	0	0	0.051546	0.22	0.032653
none______4	917	1036	120	0.044053	0	0	0.058824	0		0	0	0.029963	0.104046	0.025157
none______5	1126	1184	59	0	0	0	0	0	0		0.052632	0.038835	0	0
none______6	1376	1430	55	0	0	0	0.019417	0	0	0.052632		0.079208	0	0.031621
none______7	1658	1804	147	0	0	0.019704	0.084788	0.051546	0	0	0.079208		0.06	0.063768
none______8	4578	4630	53	0	0.097087	0	0	0.22	0.104046	0	0	0.06		0.087649
none______9	4891	5088	198	0.065574	0	0.055118	0.026549	0.032653	0.025157	0	0.063241	0.063768	0.087649
[truncated: 18 more columns]

## Sheet: IsUnstruct_q_chick
name	first	last	length	u1	u2	u1%	u2%			length	u1	u2	u1%	u2%
PRK12323__0	244	344	101	101	90.78	1	0.898812		PRK12323	101	101	90.78	1	0.898812		u1 - number of residues with the probability of being unfolded greater than 0.5
Ig-like___1	6	98	93	30	33.955	0.322581	0.365108		Ig-like	81.3594	6	17.2177	0.0686697	0.208058		u2 - sum of the probabilities of residues being unfolded
Ig-like___2	103	193	91	27	32.861	0.296703	0.36111		Fibro	84.3333	20.8333	24.811	0.259451	0.304778
Ig-like___3	695	779	85	0	16.001	0	0.188247		predic_Ig_0	51	51	46.51	1	0.911961
Ig-like___4	827	916	90	0	8.451	0	0.0939		THB_______0	31	0	4.822	0	0.155548
Ig-like___5	1037	1125	89	0	10.044	0	0.112854		Titin_Z___0	40	40	31.756	1	0.7939
Ig-like___6	1185	1275	91	0	18.221	0	0.200231		none	104.182	62.4545	57.5795	0.611658	0.547408
Ig-like___7	1284	1375	92	0	23.386	0	0.254196
Ig-like___8	1431	1522	92	0	14.713	0	0.159924
Ig-like___9	1569	1657	89	3	18.043	0.0337079	0.20273
Ig-like__10	1805	1896	92	10	16.592	0.108696	0.180348
Ig-like__11	1902	1989	88	0	15.63	0	0.177614
Ig-like__12	1995	2067	73	0	15.82	0	0.216712
Ig-like__13	2082	2153	72	0	14.348	0	0.199278
Ig-like__14	2173	2257	85	0	12.104	0	0.1424
Ig-like__15	2261	2344	84	0	8.175	0	0.0973214
Ig-like__16	2349	2431	83	55	44.009	0.662651	0.530229
Ig-like__17	2435	2520	86	0	10.232	0	0.118977
Ig-like__18	2523	2606	84	0	11.825	0	0.140774
Ig-like__19	2610	2693	84	0	12.744	0	0.151714
Ig-like__20	2698	2780	83	0	8.717	0	0.105024
Ig-like__21	2786	2869	84	0	16.1	0	0.191667
Ig-like__22	2882	2960	79	0	8.967	0	0.113506
Ig-like__23	2966	3056	91	12	22.49	0.131868	0.247143
Ig-like__24	3072	3159	88	0	16.164	0	0.183682
Ig-like__25	3187	3272	86	7	16.51	0.0813953	0.191977
Ig-like__26	3276	3366	91	35	45.943	0.384615	0.504868
Ig-like__27	3370	3458	89	17	26.131	0.191011	0.293607
Ig-like__28	3463	3553	91	0	8.88	0	0.0975824
Ig-like__29	3558	3646	89	10	19.32	0.11236	0.217079
Ig-like__30	3653	3742	90	2	24.107	0.0222222	0.267856
Ig-like__31	3746	3835	90	5	15.771	0.0555556	0.175233
Ig-like__32	3840	3923	84	6	19.368	0.0714286	0.230571
Ig-like__33	3932	4021	90	8	17.897	0.0888889	0.198856
Ig-like__34	4028	4115	88	2	14.224	0.0227273	0.161636
Ig-like__35	4124	4213	90	10	17.732	0.111111	0.197022
Ig-like__36	4220	4310	91	30	36.797	0.32967	0.404363
Ig-like__37	4317	4406	90	17	26.825	0.188889	0.298056
Ig-like__38	4426	4515	90	7	21.977	0.0777778	0.244189
Ig-like__39	4631	4699	69	0	7.771	0	0.112623
Ig-like__40	4714	4798	85	0	12.427	0	0.1462
Ig-like__41	4804	4890	87	0	18.105	0	0.208103
Ig-like__42	5354	5445	92	10	23.143	0.108696	0.251554
Ig-like__43	5458	5525	68	0	10.821	0	0.159132
Ig-like__44	5546	5619	74	10	19.049	0.135135	0.257419
Ig-like__45	5727	5733	7	0	0.736	0	0.105143
Ig-like__46	5812	5876	65	0	9.632	0	0.148185
Ig-like__47	5916	5976	61	0	8.317	0	0.136344
Ig-like__48	5989	6072	84	0	14.758	0	0.17569
Ig-like__49	6079	6161	83	0	16.551	0	0.19941
Ig-like__50	6167	6250	84	6	19.803	0.0714286	0.23575
Ig-like__51	6255	6339	85	0	14.808	0	0.174212
Ig-like__52	6345	6428	84	10	20.803	0.119048	0.247655
Ig-like__53	6436	6507	72	0	13.437	0	0.186625
Ig-like__54	6523	6607	85	10	16.028	0.117647	0.188565
Ig-like__55	6631	6695	65	0	3.967	0	0.0610308
Ig-like__56	6701	6784	84	4	20.29	0.047619	0.241548
Ig-like__57	6790	6790	1	0	0.229	0	0.229
Ig-like__58	6883	6966	84	13	22.946	0.154762	0.273167
Ig-like__59	6972	7055	84	0	9.011	0	0.107274
Ig-like__60	7062	7131	70	0	10.851	0	0.155014
Ig-like__61	7150	7232	83	0	19.588	0	0.236
Ig-like__62	7246	7323	78	0	15.167	0	0.194449
Ig-like__63	7647	7721	75	1	18.669	0.0133333	0.24892
Ig-like__64	7937	8017	81	27	33.951	0.333333	0.419148
Fibro_____1	7327	7417	91	13	19.416	0.142857	0.213363
Fibro_____2	7428	7520	93	18	26.59	0.193548	0.285914
Fibro_____3	7529	7622	94	26	31.691	0.276596	0.337138
Fibro_____4	7725	7810	86	30	24.735	0.348837	0.287616
Fibro_____5	7825	7913	89	16	22.468	0.179775	0.252449
Fibro_____6	8021	8073	53	22	23.966	0.415094	0.452189
predic_Ig_0	5089	5139	51	51	46.51	1	0.911961
THB_______0	4547	4577	31	0	4.822	0	0.155548
Titin_Z___0	401	440	40	40	31.756	1	0.7939
none_____10	5620	5726	107	0	23.172	0	0.216561
none______0	194	243	50	50	31.081	1	0.62162
none______1	345	400	56	49	38.079	0.875	0.679982
none______2	441	694	254	165	147.689	0.649606	0.581453
none______3	780	826	47	43	28.352	0.914894	0.603234
none______4	917	1036	120	0	28.438	0	0.236983
none______5	1126	1184	59	48	43.862	0.813559	0.743424
none______6	1376	1430	55	17	26.105	0.309091	0.474636
none______7	1658	1804	147	139	108.277	0.945578	0.736578
none______8	4578	4630	53	24	23.696	0.45283	0.447094
none______9	4891	5088	198	152	134.624	0.767677	0.679919
