# Supplementary figures and images for: Nonspecific Amyloid Aggregation of Chicken Smooth-Muscle Titin: In Vitro Investigations
Source: MDPI journal article supplement (doi:10.3390/ijms24021056), 2023-01-05

AFM images of a buffer solution (0.15 M glycine–KOH, pH 7.0–7.5) containing no titin

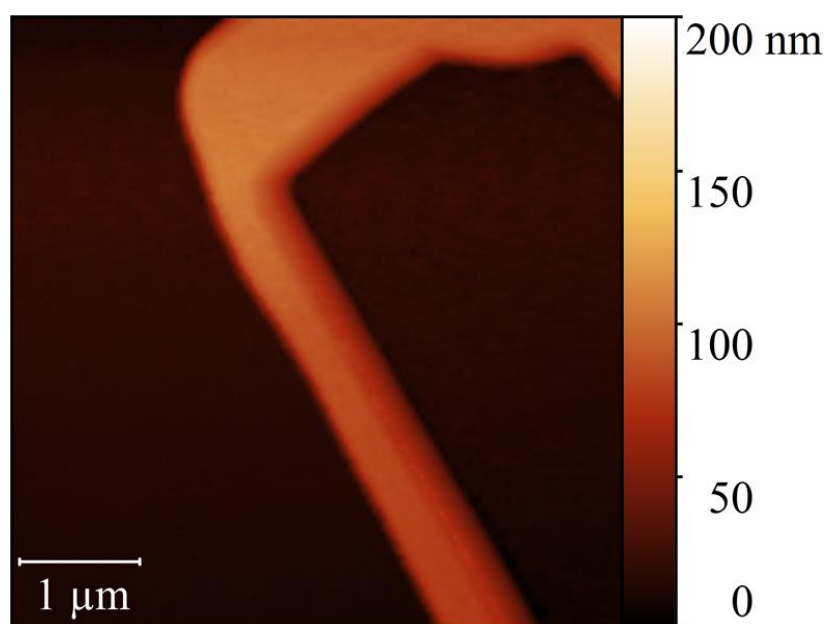

a

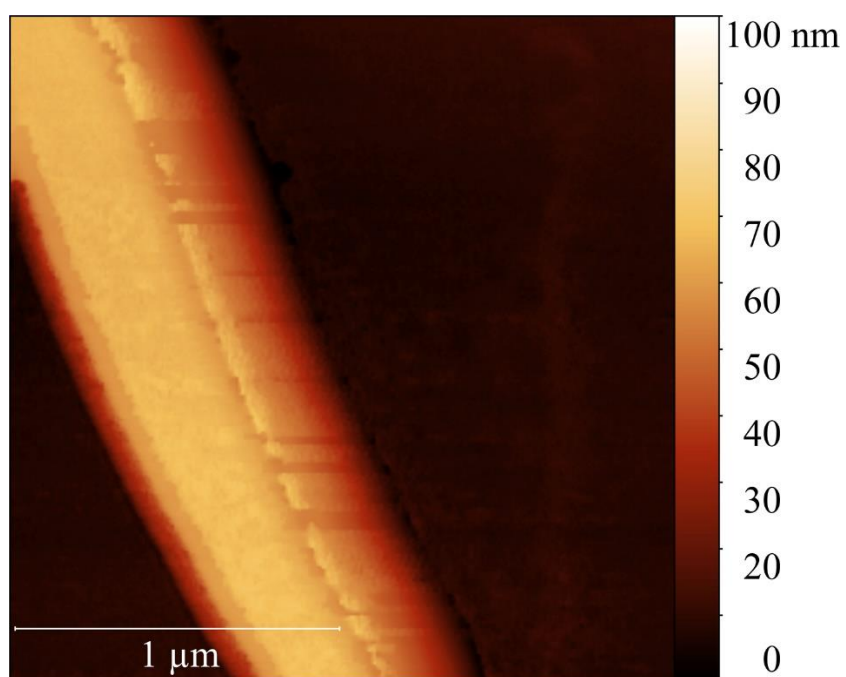

b

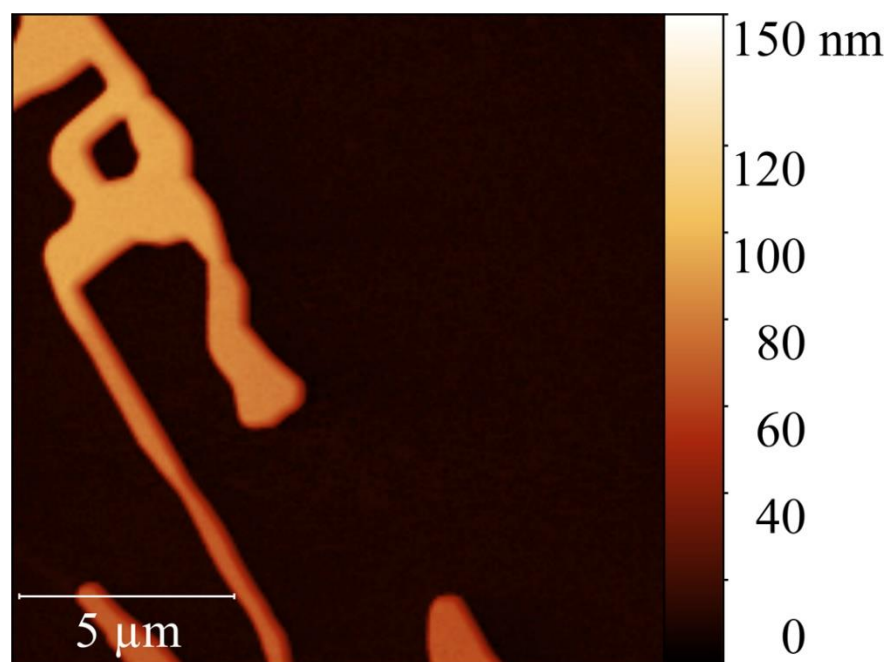

c

Supplement: s1 [file s1]
